# Supplementary material for: Global profiling of cellular targets of gambogic acid by quantitative chemical proteomics
Source: Royal Society of Chemistry journal article supplement (doi:10.1039/c6cc07581a), 2016-01-01
Supplement: c6cc07581a2.xlsx [file c6cc07581a2.xlsx]

## Sheet: HeLa
Full lists of protein targets of GA in HeLa cells
Accession	Description	positive (127) / negative (126)				positive (127) / competition (128)				positive (127) / IA (129)
		1st	2nd	Avg.	p-value	1st	2nd	Avg.	p-value	1st	2nd	Avg.	p-value
P62979	Ubiquitin-40S ribosomal protein S27a OS=Homo sapiens GN=RPS27A PE=1 SV=2	16.756	14.064	15.41	0.0277327	3.072	3.039	3.0555	0.00171889	9.537	8.212	8.8745	0.0237185
Q9BVT8	Transmembrane and ubiquitin-like domain-containing protein 1 OS=Homo sapiens GN=TMUB1 PE=1 SV=1	8.546	8.569	8.5575	0.000427761	2.701	2.679	2.69	0.00130163	5.524	5.125	5.3245	0.011921
A0FGR8	Extended synaptotagmin-2 OS=Homo sapiens GN=ESYT2 PE=1 SV=1	8.43	10.28	9.355	0.0313717	2.304	2.659	2.4815	0.0227298	4.716	5.542	5.129	0.0255759
Q99442	Translocation protein SEC62 OS=Homo sapiens GN=SEC62 PE=1 SV=1	12.001	13.014	12.5075	0.0128831	2.439	2.446	2.4425	0.000456124	6.41	3.917	5.1635	0.0753993
Q6DD88	Atlastin-3 OS=Homo sapiens GN=ATL3 PE=1 SV=1	8.692	13.23	10.961	0.0649745	2.108	2.699	2.4035	0.0389394	4.87	6.734	5.802	0.0506984
P69905	Hemoglobin subunit alpha OS=Homo sapiens GN=HBA1 PE=1 SV=2	8.304	10.135	9.2195	0.031505	2.497	2.022	2.2595	0.0333357	7.939	4.995	6.467	0.071239
P78395	Melanoma antigen preferentially expressed in tumors OS=Homo sapiens GN=PRAME PE=1 SV=1	10.598	12.495	11.5465	0.0260893	2.235	2.18	2.2075	0.00396515	4.671	5.489	5.08	0.0255725
Q6NUQ4	Transmembrane protein 214 OS=Homo sapiens GN=TMEM214 PE=1 SV=2	10.817	8.881	9.849	0.0311846	2.274	2.126	2.2	0.0107028	5.678	4.774	5.226	0.0274625
Q9NXE4	Sphingomyelin phosphodiesterase 4 OS=Homo sapiens GN=SMPD4 PE=1 SV=2	8.572	10.119	9.3455	0.0262857	2.213	2.183	2.198	0.00217224	4.567	4.535	4.551	0.00111908
Q9Y3E5	Peptidyl-tRNA hydrolase 2, mitochondrial OS=Homo sapiens GN=PTRH2 PE=1 SV=1	13.483	7.267	10.375	0.0926469	2.314	1.95	2.132	0.0271071	7.157	3.911	5.534	0.0908069
P02786	Transferrin receptor protein 1 OS=Homo sapiens GN=TFRC PE=1 SV=2	7.889	8.614	8.2515	0.0139748	2.081	2.147	2.114	0.00496848	3.806	4.261	4.0335	0.0179345
P45880	Voltage-dependent anion-selective channel protein 2 OS=Homo sapiens GN=VDAC2 PE=1 SV=2	10.543	9.695	10.119	0.0133298	2.065	2.043	2.054	0.00170466	4.516	4.38	4.448	0.00486587
Q9H3N1	Thioredoxin-related transmembrane protein 1 OS=Homo sapiens GN=TMX1 PE=1 SV=1	10.229	9.682	9.9555	0.00874249	2.08	2.005	2.0425	0.00584347	4.029	4.277	4.153	0.00950125
Q9NRG9	Aladin OS=Homo sapiens GN=AAAS PE=1 SV=1	9.637	8.107	8.872	0.027379	2.184	1.84	2.012	0.0271454	4.881	4.178	4.5295	0.0246522
P52272	Heterogeneous nuclear ribonucleoprotein M OS=Homo sapiens GN=HNRNPM PE=1 SV=3	8.261	7.981	8.121	0.00548688	2.054	1.937	1.9955	0.00932889	4.2	3.975	4.0875	0.00875861
Q13200	26S proteasome non-ATPase regulatory subunit 2 OS=Homo sapiens GN=PSMD2 PE=1 SV=3	5.686	8.663	7.1745	0.0651162	2.057	1.915	1.986	0.0113748	4.326	4.177	4.2515	0.00557725
P27824	Calnexin OS=Homo sapiens GN=CANX PE=1 SV=2	7.841	8.822	8.3315	0.0187182	1.914	2.037	1.9755	0.00990622	4.636	4.699	4.6675	0.00214818
O95563	Mitochondrial pyruvate carrier 2 OS=Homo sapiens GN=MPC2 PE=1 SV=1	9.291	9.828	9.5595	0.0089381	1.903	2.03	1.9665	0.0102749	4.639	4.557	4.598	0.00283827
O15258	Protein RER1 OS=Homo sapiens GN=RER1 PE=1 SV=1	7.813	9.362	8.5875	0.0286307	1.921	1.995	1.958	0.00601433	4.417	5.39	4.9035	0.0314781
Q96AG4	Leucine-rich repeat-containing protein 59 OS=Homo sapiens GN=LRRC59 PE=1 SV=1	7.167	8.349	7.758	0.0242019	1.879	1.975	1.927	0.0079272	3.646	4.003	3.8245	0.0148456
Q15758	Neutral amino acid transporter B(0) OS=Homo sapiens GN=SLC1A5 PE=1 SV=2	8.112	7.602	7.857	0.0103272	1.862	1.985	1.9235	0.0101738	3.837	3.877	3.857	0.00165054
Q5SNT2	Transmembrane protein 201 OS=Homo sapiens GN=TMEM201 PE=1 SV=1	8.003	6.355	7.179	0.0363762	1.86	1.956	1.908	0.00800611	3.551	3.714	3.6325	0.00714051
P42677	40S ribosomal protein S27 OS=Homo sapiens GN=RPS27 PE=1 SV=3	9.244	10.792	10.018	0.0245442	1.825	1.971	1.898	0.0122367	4.484	4.901	4.6925	0.014134
P62277	40S ribosomal protein S13 OS=Homo sapiens GN=RPS13 PE=1 SV=2	6.127	6.483	6.305	0.008984	1.858	1.916	1.887	0.0048915	2.806	2.894	2.85	0.00491387
Q99714	3-hydroxyacyl-CoA dehydrogenase type-2 OS=Homo sapiens GN=HSD17B10 PE=1 SV=3	7.704	9.247	8.4755	0.0288952	1.722	2.03	1.876	0.0260715	3.795	5.522	4.6585	0.0583398
Q9Y6C9	Mitochondrial carrier homolog 2 OS=Homo sapiens GN=MTCH2 PE=1 SV=1	11.202	10.63	10.916	0.00833783	1.835	1.912	1.8735	0.00654028	5.57	5.438	5.504	0.00381676
O43681	ATPase ASNA1 OS=Homo sapiens GN=ASNA1 PE=1 SV=2	9.308	8.249	8.7785	0.0191765	1.912	1.831	1.8715	0.00688728	4.61	4.011	4.3105	0.0220812
Q07020	60S ribosomal protein L18 OS=Homo sapiens GN=RPL18 PE=1 SV=2	3.714	3.578	3.646	0.00593597	1.859	1.873	1.866	0.00119408	1.781	1.729	1.755	0.00471536
Q9P035	Very-long-chain (3R)-3-hydroxyacyl-CoA dehydratase 3 OS=Homo sapiens GN=HACD3 PE=1 SV=2	6.734	7.567	7.1505	0.0185199	1.827	1.856	1.8415	0.00250633	4.281	4.01	4.1455	0.0104006
Q02878	60S ribosomal protein L6 OS=Homo sapiens GN=RPL6 PE=1 SV=3	5.139	5.008	5.0735	0.00410922	1.848	1.789	1.8185	0.00516322	2.668	2.498	2.583	0.010471
P31942	Heterogeneous nuclear ribonucleoprotein H3 OS=Homo sapiens GN=HNRNPH3 PE=1 SV=2	8.947	9.11	9.0285	0.0028733	1.777	1.855	1.816	0.0068349	4.973	4.581	4.777	0.0130529
P62854	40S ribosomal protein S26 OS=Homo sapiens GN=RPS26 PE=1 SV=3	10.325	8.311	9.318	0.0342669	1.801	1.784	1.7925	0.00150941	4.359	4.252	4.3055	0.0039551
P84098	60S ribosomal protein L19 OS=Homo sapiens GN=RPL19 PE=1 SV=1	6.221	4.698	5.4595	0.0441138	1.825	1.737	1.781	0.00786232	2.935	2.268	2.6015	0.0405845
Q9P258	Protein RCC2 OS=Homo sapiens GN=RCC2 PE=1 SV=2	7.069	6.961	7.015	0.00245023	1.769	1.792	1.7805	0.00205589	3.593	3.824	3.7085	0.00991045
Q8TCT9	Minor histocompatibility antigen H13 OS=Homo sapiens GN=HM13 PE=1 SV=1	12.913	9.565	11.239	0.0470649	1.806	1.746	1.776	0.00537634	6.649	5.021	5.835	0.0441204
Q96TC7	Regulator of microtubule dynamics protein 3 OS=Homo sapiens GN=RMDN3 PE=1 SV=2	7.216	6.413	6.8145	0.0187327	1.712	1.836	1.774	0.0111202	3.975	3.389	3.682	0.0252767
P81605	Dermcidin OS=Homo sapiens GN=DCD PE=1 SV=2	6.645	6.179	6.412	0.0115617	1.8	1.746	1.773	0.00484698	3.245	2.981	3.113	0.0134892
P41091	Eukaryotic translation initiation factor 2 subunit 3 OS=Homo sapiens GN=EIF2S3 PE=1 SV=3	8.22	7.415	7.8175	0.0163744	1.718	1.817	1.7675	0.00891215	4.135	4.57	4.3525	0.0158931
P61204	ADP-ribosylation factor 3 OS=Homo sapiens GN=ARF3 PE=1 SV=2	5.645	5.901	5.773	0.00705647	1.718	1.815	1.7665	0.00873714	3.346	3.44	3.393	0.00440896
P22102	Trifunctional purine biosynthetic protein adenosine-3 OS=Homo sapiens GN=GART PE=1 SV=1	7.095	6.746	6.9205	0.00802446	1.744	1.786	1.765	0.00378708	3.359	3.388	3.3735	0.00136815
P62910	60S ribosomal protein L32 OS=Homo sapiens GN=RPL32 PE=1 SV=2	3.669	3.589	3.629	0.00350837	1.771	1.759	1.765	0.00108207	1.748	1.699	1.7235	0.00452455
Q99873	Protein arginine N-methyltransferase 1 OS=Homo sapiens GN=PRMT1 PE=1 SV=2	6.81	6.411	6.6105	0.00960344	1.731	1.78	1.7555	0.00444209	4.069	3.692	3.8805	0.0154501
P46781	40S ribosomal protein S9 OS=Homo sapiens GN=RPS9 PE=1 SV=3	3.044	3.047	3.0455	0.000156777	1.734	1.77	1.752	0.00327019	1.76	1.713	1.7365	0.00430741
P31943	Heterogeneous nuclear ribonucleoprotein H OS=Homo sapiens GN=HNRNPH1 PE=1 SV=4	7.461	7.174	7.3175	0.00624142	1.757	1.718	1.7375	0.00357225	3.979	3.561	3.77	0.0176283
P26640	Valine--tRNA ligase OS=Homo sapiens GN=VARS PE=1 SV=4	6.941	8.146	7.5435	0.0253696	1.688	1.785	1.7365	0.008888	3.379	4.028	3.7035	0.0278192
Q13085	Acetyl-CoA carboxylase 1 OS=Homo sapiens GN=ACACA PE=1 SV=2	3.296	3.549	3.4225	0.0117598	1.723	1.74	1.7315	0.00156258	1.572	1.623	1.5975	0.00508057
P02768	Serum albumin OS=Homo sapiens GN=ALB PE=1 SV=2	6.536	6.521	6.5285	0.000365677	1.743	1.71	1.7265	0.00304197	3.263	3.196	3.2295	0.00330175
P50914	60S ribosomal protein L14 OS=Homo sapiens GN=RPL14 PE=1 SV=4	6.285	6.761	6.523	0.0116088	1.686	1.765	1.7255	0.00728545	3.565	3.376	3.4705	0.00866528
P09972	Fructose-bisphosphate aldolase C OS=Homo sapiens GN=ALDOC PE=1 SV=2	7.469	7.085	7.277	0.0083965	1.736	1.709	1.7225	0.00249469	2.756	3.451	3.1035	0.0354934
P62753	40S ribosomal protein S6 OS=Homo sapiens GN=RPS6 PE=1 SV=1	5.895	5.97	5.9325	0.00201205	1.721	1.719	1.72	0.000185064	2.967	2.996	2.9815	0.00154803
P09651	Heterogeneous nuclear ribonucleoprotein A1 OS=Homo sapiens GN=HNRNPA1 PE=1 SV=5	7.182	7.584	7.383	0.00866375	1.754	1.685	1.7195	0.0063857	1.719	2.66	2.1895	0.0673767
P62937	Peptidyl-prolyl cis-trans isomerase A OS=Homo sapiens GN=PPIA PE=1 SV=2	7.011	6.832	6.9215	0.00411575	1.729	1.705	1.717	0.00222461	3.531	3.459	3.495	0.00327861
Q15185	Prostaglandin E synthase 3 OS=Homo sapiens GN=PTGES3 PE=1 SV=1	8.005	8.241	8.123	0.00462365	1.682	1.746	1.714	0.00594208	4.13	4.049	4.0895	0.00315225
P62280	40S ribosomal protein S11 OS=Homo sapiens GN=RPS11 PE=1 SV=3	6.857	6.921	6.889	0.00147857	1.7	1.728	1.714	0.00259991	3.718	3.628	3.673	0.0038996
P34932	Heat shock 70 kDa protein 4 OS=Homo sapiens GN=HSPA4 PE=1 SV=4	7.968	6.509	7.2385	0.0319715	1.736	1.682	1.709	0.00502847	4.376	3.408	3.892	0.0393821
P62263	40S ribosomal protein S14 OS=Homo sapiens GN=RPS14 PE=1 SV=3	6.589	6.593	6.591	9.65893e-05	1.713	1.692	1.7025	0.00196312	3.379	3.533	3.456	0.0070908
P50991	T-complex protein 1 subunit delta OS=Homo sapiens GN=CCT4 PE=1 SV=4	5.125	3.457	4.291	0.061105	1.529	1.876	1.7025	0.032327	2.874	2.108	2.491	0.048561
P32119	Peroxiredoxin-2 OS=Homo sapiens GN=PRDX2 PE=1 SV=5	6.836	6.629	6.7325	0.00489305	1.665	1.735	1.7	0.00655251	3.356	3.257	3.3065	0.00476491
P18031	Tyrosine-protein phosphatase non-receptor type 1 OS=Homo sapiens GN=PTPN1 PE=1 SV=1	7.494	8.444	7.969	0.0189507	1.668	1.717	1.6925	0.00460741	4.367	4.65	4.5085	0.00998693
P68371	Tubulin beta-4B chain OS=Homo sapiens GN=TUBB4B PE=1 SV=1	8.384	5.317	6.8505	0.0700988	1.732	1.649	1.6905	0.0078126	4.162	2.645	3.4035	0.0697976
P14618	Pyruvate kinase PKM OS=Homo sapiens GN=PKM PE=1 SV=4	4.794	6.725	5.7595	0.0528686	1.715	1.66	1.6875	0.00518681	3.231	3.464	3.3475	0.0110734
P23246	Splicing factor, proline- and glutamine-rich OS=Homo sapiens GN=SFPQ PE=1 SV=2	5.41	5.175	5.2925	0.00706571	1.745	1.625	1.685	0.0113297	2.899	2.565	2.732	0.0194333
P16615	Sarcoplasmic/endoplasmic reticulum calcium ATPase 2 OS=Homo sapiens GN=ATP2A2 PE=1 SV=1	6.841	8.29	7.5655	0.0303898	1.653	1.708	1.6805	0.00520841	3.341	4.187	3.764	0.0356223
P07195	L-lactate dehydrogenase B chain OS=Homo sapiens GN=LDHB PE=1 SV=2	7.147	7.136	7.1415	0.000245145	1.685	1.669	1.677	0.00151846	3.554	3.539	3.5465	0.000673148
P22626	Heterogeneous nuclear ribonucleoproteins A2/B1 OS=Homo sapiens GN=HNRNPA2B1 PE=1 SV=2	5.387	5.062	5.2245	0.00989735	1.701	1.651	1.676	0.00474771	2.681	2.597	2.639	0.00506551
P50990	T-complex protein 1 subunit theta OS=Homo sapiens GN=CCT8 PE=1 SV=4	7.542	7.218	7.38	0.00698617	1.668	1.677	1.6725	0.000856437	3.937	3.501	3.719	0.0186373
Q16658	Fascin OS=Homo sapiens GN=FSCN1 PE=1 SV=3	7.214	6.493	6.8535	0.016728	1.71	1.628	1.669	0.0078179	3.393	3.228	3.3105	0.00793087
P40429	60S ribosomal protein L13a OS=Homo sapiens GN=RPL13A PE=1 SV=2	5.048	4.728	4.888	0.0104156	1.673	1.665	1.669	0.000762874	2.447	2.409	2.428	0.00249084
P26038	Moesin OS=Homo sapiens GN=MSN PE=1 SV=3	6.567	5.878	6.2225	0.0176048	1.602	1.734	1.668	0.0125884	3.326	3.32	3.323	0.00028737
P62241	40S ribosomal protein S8 OS=Homo sapiens GN=RPS8 PE=1 SV=2	7.465	6.985	7.225	0.0105697	1.627	1.709	1.668	0.00782259	4.077	3.929	4.003	0.00588365
Q00839	Heterogeneous nuclear ribonucleoprotein U OS=Homo sapiens GN=HNRNPU PE=1 SV=6	8.272	8.669	8.4705	0.007458	1.653	1.681	1.667	0.00267321	4.034	4.401	4.2175	0.0138407
P15880	40S ribosomal protein S2 OS=Homo sapiens GN=RPS2 PE=1 SV=2	7	6.756	6.878	0.0056455	1.672	1.662	1.667	0.000954736	3.766	3.644	3.705	0.00524026
E9PRG8	Uncharacterized protein C11orf98 OS=Homo sapiens GN=C11orf98 PE=4 SV=1	3.022	3.612	3.317	0.0282349	1.656	1.676	1.666	0.0019106	1.711	2.151	1.931	0.0361095
P05023	Sodium/potassium-transporting ATPase subunit alpha-1 OS=Homo sapiens GN=ATP1A1 PE=1 SV=1	7.694	8.528	8.111	0.0163504	1.655	1.669	1.662	0.00134065	3.702	4.4	4.051	0.0273554
P04075	Fructose-bisphosphate aldolase A OS=Homo sapiens GN=ALDOA PE=1 SV=2	7.243	7.034	7.1385	0.00465938	1.656	1.667	1.6615	0.00105369	3.952	3.86	3.906	0.00374848
P12236	ADP/ATP translocase 3 OS=Homo sapiens GN=SLC25A6 PE=1 SV=4	8.028	11.671	9.8495	0.0582084	1.619	1.702	1.6605	0.0079537	5.202	6.787	5.9945	0.0418394
P04406	Glyceraldehyde-3-phosphate dehydrogenase OS=Homo sapiens GN=GAPDH PE=1 SV=3	5.741	5.978	5.8595	0.00643648	1.627	1.688	1.6575	0.00585663	2.821	2.888	2.8545	0.00373547
P18206	Vinculin OS=Homo sapiens GN=VCL PE=1 SV=4	6.597	6.725	6.661	0.00305828	1.675	1.64	1.6575	0.00336061	3.712	3.215	3.4635	0.0227991
P49207	60S ribosomal protein L34 OS=Homo sapiens GN=RPL34 PE=1 SV=3	3.364	3.404	3.384	0.00188124	1.649	1.662	1.6555	0.00124978	1.9	1.923	1.9115	0.001915
P35579	Myosin-9 OS=Homo sapiens GN=MYH9 PE=1 SV=4	6.232	5.512	5.872	0.0194905	1.649	1.661	1.655	0.00115399	3.752	2.938	3.345	0.0385406
P17987	T-complex protein 1 subunit alpha OS=Homo sapiens GN=TCP1 PE=1 SV=1	5.961	6.701	6.331	0.0185817	1.649	1.659	1.654	0.00096224	3.069	3.172	3.1205	0.00525283
P60842	Eukaryotic initiation factor 4A-I OS=Homo sapiens GN=EIF4A1 PE=1 SV=1	6.738	7.426	7.082	0.0154494	1.644	1.649	1.6465	0.000483313	3.294	3.097	3.1955	0.00980867
P07737	Profilin-1 OS=Homo sapiens GN=PFN1 PE=1 SV=2	6.105	6.896	6.5005	0.0193426	1.615	1.676	1.6455	0.00589933	3.489	3.34	3.4145	0.00694401
P18124	60S ribosomal protein L7 OS=Homo sapiens GN=RPL7 PE=1 SV=1	4.533	4.445	4.489	0.00311989	1.646	1.641	1.6435	0.000484195	2.741	2.521	2.631	0.0133005
P49327	Fatty acid synthase OS=Homo sapiens GN=FASN PE=1 SV=3	6.591	7.086	6.8385	0.0115153	1.653	1.633	1.643	0.00193735	3.372	3.389	3.3805	0.000800363
P35998	26S protease regulatory subunit 7 OS=Homo sapiens GN=PSMC2 PE=1 SV=3	4.88	5.618	5.249	0.0223401	1.667	1.618	1.6425	0.00474765	3.569	2.915	3.242	0.0319977
Q06830	Peroxiredoxin-1 OS=Homo sapiens GN=PRDX1 PE=1 SV=1	7.134	7.636	7.385	0.0108145	1.676	1.608	1.642	0.00659013	3.344	3.367	3.3555	0.00109091
P62851	40S ribosomal protein S25 OS=Homo sapiens GN=RPS25 PE=1 SV=1	4.676	5.297	4.9865	0.019795	1.656	1.625	1.6405	0.00300741	2.571	2.591	2.581	0.00123328
P07900	Heat shock protein HSP 90-alpha OS=Homo sapiens GN=HSP90AA1 PE=1 SV=5	7.628	8.07	7.849	0.00896011	1.629	1.652	1.6405	0.00223133	3.912	4.096	4.004	0.00731253
P56192	Methionine--tRNA ligase, cytoplasmic OS=Homo sapiens GN=MARS PE=1 SV=2	4.103	6.528	5.3155	0.0713871	1.641	1.64	1.6405	9.70161e-05	2.295	3.313	2.804	0.0571592
P21964	Catechol O-methyltransferase OS=Homo sapiens GN=COMT PE=1 SV=2	8.975	6.982	7.9785	0.0395515	1.671	1.607	1.639	0.00621392	4.884	3.053	3.9685	0.0721689
P52701	DNA mismatch repair protein Msh6 OS=Homo sapiens GN=MSH6 PE=1 SV=2	7.022	7.889	7.4555	0.0184873	1.715	1.562	1.6385	0.0148508	3.727	4.087	3.907	0.0146545
P46776	60S ribosomal protein L27a OS=Homo sapiens GN=RPL27A PE=1 SV=2	7.499	6.89	7.1945	0.0134641	1.646	1.63	1.638	0.00155461	3.942	3.807	3.8745	0.00554491
P63104	14-3-3 protein zeta/delta OS=Homo sapiens GN=YWHAZ PE=1 SV=1	6.981	6.495	6.738	0.0114746	1.617	1.658	1.6375	0.00398474	3.431	3.139	3.285	0.0141378
P07237	Protein disulfide-isomerase OS=Homo sapiens GN=P4HB PE=1 SV=3	6.632	6.277	6.4545	0.00875138	1.653	1.621	1.637	0.00311105	2.315	1.603	1.959	0.0572205
P46779	60S ribosomal protein L28 OS=Homo sapiens GN=RPL28 PE=1 SV=3	4.562	4.417	4.4895	0.00513987	1.651	1.623	1.637	0.00272219	2.352	2.34	2.346	0.00081409
O00299	Chloride intracellular channel protein 1 OS=Homo sapiens GN=CLIC1 PE=1 SV=4	7.124	6.673	6.8985	0.0104013	1.642	1.624	1.633	0.00175429	2.259	2.333	2.296	0.00512911
P62888	60S ribosomal protein L30 OS=Homo sapiens GN=RPL30 PE=1 SV=2	7.145	7.746	7.4455	0.01284	1.675	1.59	1.6325	0.00828491	3.625	3.278	3.4515	0.0159873
P62820	Ras-related protein Rab-1A OS=Homo sapiens GN=RAB1A PE=1 SV=3	7.043	8.114	7.5785	0.0224546	1.62	1.643	1.6315	0.00224364	3.944	4.23	4.087	0.0111328
P50395	Rab GDP dissociation inhibitor beta OS=Homo sapiens GN=GDI2 PE=1 SV=2	4.991	6.656	5.8235	0.0451978	1.647	1.615	1.631	0.0031225	2.856	3.295	3.0755	0.0226795
P00338	L-lactate dehydrogenase A chain OS=Homo sapiens GN=LDHA PE=1 SV=2	6.94	7.566	7.253	0.013728	1.63	1.632	1.631	0.000195162	3.464	3.787	3.6255	0.0141699
P27635	60S ribosomal protein L10 OS=Homo sapiens GN=RPL10 PE=1 SV=4	9.212	7.916	8.564	0.0240393	1.598	1.663	1.6305	0.00634388	4.549	3.492	4.0205	0.0416037
Q96RQ3	Methylcrotonoyl-CoA carboxylase subunit alpha, mitochondrial OS=Homo sapiens GN=MCCC1 PE=1 SV=3	3.093	4.517	3.805	0.0588819	1.597	1.663	1.63	0.00644343	1.583	2.24	1.9115	0.0541738
P38606	V-type proton ATPase catalytic subunit A OS=Homo sapiens GN=ATP6V1A PE=1 SV=2	5.199	6.374	5.7865	0.0322075	1.646	1.614	1.63	0.00312441	1.125	1.142	1.1335	0.00238693
P23396	40S ribosomal protein S3 OS=Homo sapiens GN=RPS3 PE=1 SV=2	7.773	6.573	7.173	0.0265638	1.638	1.622	1.63	0.00156224	3.584	3.348	3.466	0.0108327
Q7KZF4	Staphylococcal nuclease domain-containing protein 1 OS=Homo sapiens GN=SND1 PE=1 SV=1	6.276	6.847	6.5615	0.0138414	1.58	1.668	1.624	0.00862205	3.342	2.996	3.169	0.0173597
P08243	Asparagine synthetase [glutamine-hydrolyzing] OS=Homo sapiens GN=ASNS PE=1 SV=4	7.145	7.884	7.5145	0.0156392	1.616	1.631	1.6235	0.00147047	3.474	3.757	3.6155	0.0124514
P29401	Transketolase OS=Homo sapiens GN=TKT PE=1 SV=3	6.231	5.742	5.9865	0.0129932	1.579	1.664	1.6215	0.00834109	2.81	3.08	2.945	0.0145812
P62266	40S ribosomal protein S23 OS=Homo sapiens GN=RPS23 PE=1 SV=3	8.307	8.271	8.289	0.000691226	1.594	1.644	1.619	0.00491483	4.342	4.019	4.1805	0.0122908
P25705	ATP synthase subunit alpha, mitochondrial OS=Homo sapiens GN=ATP5A1 PE=1 SV=1	6.267	6.334	6.3005	0.00169245	1.596	1.642	1.619	0.0045217	3.424	3.235	3.3295	0.00903205
Q13838	Spliceosome RNA helicase DDX39B OS=Homo sapiens GN=DDX39B PE=1 SV=1	7.004	7.917	7.4605	0.0194528	1.59	1.646	1.618	0.0055079	3.837	4.229	4.033	0.0154574
Q8WUX1	Sodium-coupled neutral amino acid transporter 5 OS=Homo sapiens GN=SLC38A5 PE=1 SV=1	10.343	11.831	11.087	0.0213284	1.665	1.569	1.617	0.00944613	4.767	6.134	5.4505	0.0397092
P26641	Elongation factor 1-gamma OS=Homo sapiens GN=EEF1G PE=1 SV=3	7.098	6.778	6.938	0.00733937	1.673	1.558	1.6155	0.0113247	3.7	3.268	3.484	0.0197093
P30153	Serine/threonine-protein phosphatase 2A 65 kDa regulatory subunit A alpha isoform OS=Homo sapiens GN=PPP2R1A PE=1 SV=4	6.692	7.181	6.9365	0.0112152	1.604	1.625	1.6145	0.00207012	4.008	3.609	3.8085	0.0166587
P43487	Ran-specific GTPase-activating protein OS=Homo sapiens GN=RANBP1 PE=1 SV=1	7.004	5.661	6.3325	0.033628	1.562	1.664	1.613	0.010061	1.804	1.806	1.805	0.000176349
P35232	Prohibitin OS=Homo sapiens GN=PHB PE=1 SV=1	6.726	6.668	6.697	0.00137837	1.635	1.591	1.613	0.00434122	3.128	3.43	3.279	0.014648
P11142	Heat shock cognate 71 kDa protein OS=Homo sapiens GN=HSPA8 PE=1 SV=1	5.799	5.938	5.8685	0.00376953	1.591	1.618	1.6045	0.00267814	2.835	2.874	2.8545	0.00217444
P10599	Thioredoxin OS=Homo sapiens GN=TXN PE=1 SV=3	7.105	6.028	6.5665	0.0260454	1.523	1.684	1.6035	0.0159666	1.024	0.778	0.901	0.0431871
Q99460	26S proteasome non-ATPase regulatory subunit 1 OS=Homo sapiens GN=PSMD1 PE=1 SV=2	6.177	6.999	6.588	0.0198324	1.624	1.582	1.603	0.00416976	3.447	3.715	3.581	0.0119055
P55072	Transitional endoplasmic reticulum ATPase OS=Homo sapiens GN=VCP PE=1 SV=4	6.241	6.055	6.148	0.00481467	1.6	1.606	1.603	0.000595713	3.576	3.184	3.38	0.0184376
P12277	Creatine kinase B-type OS=Homo sapiens GN=CKB PE=1 SV=1	6.67	7.078	6.874	0.00944372	1.652	1.548	1.6	0.0103414	2.757	2.096	2.4265	0.0430901
P31939	Bifunctional purine biosynthesis protein PURH OS=Homo sapiens GN=ATIC PE=1 SV=3	6.423	5.317	5.87	0.029899	1.511	1.685	1.598	0.0173127	2.576	3.22	2.898	0.0352233
Q9NVI1	Fanconi anemia group I protein OS=Homo sapiens GN=FANCI PE=1 SV=4	7.174	7.83	7.502	0.0139082	1.561	1.625	1.593	0.00639331	4.764	3.761	4.2625	0.037279
P22234	Multifunctional protein ADE2 OS=Homo sapiens GN=PAICS PE=1 SV=3	8.766	6.365	7.5655	0.050092	1.569	1.616	1.5925	0.00469685	3.86	3.236	3.548	0.0279194
P0DMV9	Heat shock 70 kDa protein 1B OS=Homo sapiens GN=HSPA1B PE=1 SV=1	5.981	6.096	6.0385	0.00303093	1.599	1.584	1.5915	0.00150004	2.939	3.048	2.9935	0.00579455
P63241	Eukaryotic translation initiation factor 5A-1 OS=Homo sapiens GN=EIF5A PE=1 SV=2	6.255	6.755	6.505	0.0122273	1.568	1.614	1.591	0.00460127	3.355	3.568	3.4615	0.00979035
P23528	Cofilin-1 OS=Homo sapiens GN=CFL1 PE=1 SV=3	6.633	5.901	6.267	0.0185686	1.571	1.61	1.5905	0.00390238	2.663	2.618	2.6405	0.00271229
P52209	6-phosphogluconate dehydrogenase, decarboxylating OS=Homo sapiens GN=PGD PE=1 SV=3	4.801	5.992	5.3965	0.0349837	1.566	1.611	1.5885	0.00450834	2.617	2.797	2.707	0.010579
P11498	Pyruvate carboxylase, mitochondrial OS=Homo sapiens GN=PC PE=1 SV=2	3.421	3.559	3.49	0.00629241	1.595	1.581	1.588	0.00140312	1.833	1.799	1.816	0.00297969
P13639	Elongation factor 2 OS=Homo sapiens GN=EEF2 PE=1 SV=4	6.615	6.397	6.506	0.00533239	1.583	1.593	1.588	0.00100223	3.407	3.308	3.3575	0.00469254
P61313	60S ribosomal protein L15 OS=Homo sapiens GN=RPL15 PE=1 SV=2	7.374	6.822	7.098	0.012371	1.577	1.597	1.587	0.00200571	4.225	3.495	3.86	0.03001
Q9Y490	Talin-1 OS=Homo sapiens GN=TLN1 PE=1 SV=3	5.408	5.362	5.385	0.00135953	1.406	1.765	1.5855	0.0358842	3.184	3.109	3.1465	0.00379344
P62917	60S ribosomal protein L8 OS=Homo sapiens GN=RPL8 PE=1 SV=2	7.087	6.989	7.038	0.0022161	1.511	1.66	1.5855	0.0149459	3.656	3.457	3.5565	0.00890302
P10515	Dihydrolipoyllysine-residue acetyltransferase component of pyruvate dehydrogenase complex, mitochondrial OS=Homo sapiens GN=DLAT PE=1 SV=3	8.054	8.957	8.5055	0.0168811	1.588	1.577	1.5825	0.00110629	4.596	4.565	4.5805	0.00107713
Q5JTH9	RRP12-like protein OS=Homo sapiens GN=RRP12 PE=1 SV=2	8.496	7.267	7.8815	0.0247677	1.552	1.612	1.582	0.00603549	4.068	3.933	4.0005	0.0053703
P63244	Receptor of activated protein C kinase 1 OS=Homo sapiens GN=RACK1 PE=1 SV=3	6.753	7.419	7.086	0.0149477	1.524	1.637	1.5805	0.0113742	3.523	3.729	3.626	0.00903947
Q15021	Condensin complex subunit 1 OS=Homo sapiens GN=NCAPD2 PE=1 SV=3	6.536	6.327	6.4315	0.00517149	1.634	1.526	1.58	0.0108747	3.378	2.95	3.164	0.0214964
Q13263	Transcription intermediary factor 1-beta OS=Homo sapiens GN=TRIM28 PE=1 SV=5	6.41	7.627	7.0185	0.0275285	1.566	1.594	1.58	0.00282039	3.357	3.861	3.609	0.0221901
P46977	Dolichyl-diphosphooligosaccharide--protein glycosyltransferase subunit STT3A OS=Homo sapiens GN=STT3A PE=1 SV=2	11.681	8.906	10.2935	0.0426491	1.549	1.61	1.5795	0.00614577	6.076	4.929	5.5025	0.0330566
P02008	Hemoglobin subunit zeta OS=Homo sapiens GN=HBZ PE=1 SV=2	7.255	7.113	7.184	0.00314578	1.602	1.557	1.5795	0.00453402	3.893	3.803	3.848	0.00372227
P60709	Actin, cytoplasmic 1 OS=Homo sapiens GN=ACTB PE=1 SV=1	6.027	6.458	6.2425	0.0109841	1.575	1.583	1.579	0.000806356	3.095	3.184	3.1395	0.0045115
Q12931	Heat shock protein 75 kDa, mitochondrial OS=Homo sapiens GN=TRAP1 PE=1 SV=3	5.482	6.369	5.9255	0.0237799	1.54	1.615	1.5775	0.00756537	2.671	3.404	3.0375	0.038222
P40926	Malate dehydrogenase, mitochondrial OS=Homo sapiens GN=MDH2 PE=1 SV=3	7.398	6.723	7.0605	0.015204	1.611	1.54	1.5755	0.00717111	3.597	3.492	3.5445	0.00471436
O76021	Ribosomal L1 domain-containing protein 1 OS=Homo sapiens GN=RSL1D1 PE=1 SV=3	5.774	6.265	6.0195	0.0129748	1.562	1.587	1.5745	0.00252702	3.358	3.551	3.4545	0.00888954
Q9Y3U8	60S ribosomal protein L36 OS=Homo sapiens GN=RPL36 PE=1 SV=3	5.292	5.292	5.292	#DIV/0!	1.575	1.572	1.5735	0.000303441	2.813	2.642	2.7275	0.00997492
P62805	Histone H4 OS=Homo sapiens GN=HIST1H4A PE=1 SV=2	2.229	2.701	2.465	0.0303825	1.566	1.58	1.573	0.0014165	1.198	1.44	1.319	0.029119
Q8TEX9	Importin-4 OS=Homo sapiens GN=IPO4 PE=1 SV=2	5.547	5.937	5.742	0.0108057	1.564	1.581	1.5725	0.00172058	3.27	3.18	3.225	0.00444125
P02100	Hemoglobin subunit epsilon OS=Homo sapiens GN=HBE1 PE=1 SV=2	4.275	4.796	4.5355	0.0182623	1.568	1.577	1.5725	0.0009109	2.17	2.303	2.2365	0.00946183
P62826	GTP-binding nuclear protein Ran OS=Homo sapiens GN=RAN PE=1 SV=3	8.013	7.944	7.9785	0.0013764	1.569	1.575	1.572	0.000607461	3.822	4.035	3.9285	0.00862714
P08865	40S ribosomal protein SA OS=Homo sapiens GN=RPSA PE=1 SV=4	5.339	5.57	5.4545	0.00673926	1.495	1.647	1.571	0.0153868	2.796	2.923	2.8595	0.00706744
P40227	T-complex protein 1 subunit zeta OS=Homo sapiens GN=CCT6A PE=1 SV=3	5.45	6.236	5.843	0.0213773	1.586	1.556	1.571	0.00303915	3.193	3.206	3.1995	0.000646667
P52597	Heterogeneous nuclear ribonucleoprotein F OS=Homo sapiens GN=HNRNPF PE=1 SV=3	9.776	5.405	7.5905	0.0892359	1.555	1.586	1.5705	0.00314145	4.597	2.8	3.6985	0.0758595
Q9BXJ9	N-alpha-acetyltransferase 15, NatA auxiliary subunit OS=Homo sapiens GN=NAA15 PE=1 SV=1	8.175	8.51	8.3425	0.00639014	1.568	1.57	1.569	0.000202874	4.585	4.268	4.4265	0.0113929
P37837	Transaldolase OS=Homo sapiens GN=TALDO1 PE=1 SV=2	6.809	6.318	6.5635	0.0119005	1.518	1.616	1.567	0.00995029	3.826	3.35	3.588	0.0210833
P48643	T-complex protein 1 subunit epsilon OS=Homo sapiens GN=CCT5 PE=1 SV=1	6.328	6.661	6.4945	0.00815875	1.554	1.575	1.5645	0.00213628	3.751	3.442	3.5965	0.0136657
P61247	40S ribosomal protein S3a OS=Homo sapiens GN=RPS3A PE=1 SV=2	6.443	6.43	6.4365	0.00032145	1.545	1.582	1.5635	0.0037662	3.358	3.514	3.436	0.00722465
Q12907	Vesicular integral-membrane protein VIP36 OS=Homo sapiens GN=LMAN2 PE=1 SV=1	5.966	5.959	5.9625	0.000186849	1.502	1.624	1.563	0.0124165	2.807	3.578	3.1925	0.0382513
Q9NU22	Midasin OS=Homo sapiens GN=MDN1 PE=1 SV=2	7.167	7.019	7.093	0.00332075	1.559	1.566	1.5625	0.000713013	3.814	3.738	3.776	0.00320322
P26373	60S ribosomal protein L13 OS=Homo sapiens GN=RPL13 PE=1 SV=4	2.908	3.043	2.9755	0.00721971	1.567	1.557	1.562	0.00101891	1.583	1.614	1.5985	0.00308642
Q9Y613	FH1/FH2 domain-containing protein 1 OS=Homo sapiens GN=FHOD1 PE=1 SV=3	8.117	7.375	7.746	0.015234	1.446	1.671	1.5585	0.0229373	4.671	3.709	4.19	0.0363818
P49368	T-complex protein 1 subunit gamma OS=Homo sapiens GN=CCT3 PE=1 SV=4	7.302	6.633	6.9675	0.0152699	1.581	1.535	1.558	0.00469871	3.706	3.419	3.5625	0.0128148
P08670	Vimentin OS=Homo sapiens GN=VIM PE=1 SV=4	1.877	3.071	2.474	0.0753703	1.616	1.497	1.5565	0.012162	1.363	1.625	1.494	0.0278395
P06748	Nucleophosmin OS=Homo sapiens GN=NPM1 PE=1 SV=2	5.833	5.31	5.5715	0.014929	1.513	1.591	1.552	0.00799708	3.032	2.566	2.799	0.0264364
Q00534	Cyclin-dependent kinase 6 OS=Homo sapiens GN=CDK6 PE=1 SV=1	11.28	8.602	9.941	0.0426182	1.736	1.364	1.55	0.0380154	5.195	4.078	4.6365	0.0381589
P06733	Alpha-enolase OS=Homo sapiens GN=ENO1 PE=1 SV=2	6.126	6.257	6.1915	0.00336728	1.541	1.559	1.55	0.00184823	3.448	3.263	3.3555	0.00877253
P26639	Threonine--tRNA ligase, cytoplasmic OS=Homo sapiens GN=TARS PE=1 SV=3	6.59	6.567	6.5785	0.000556443	1.554	1.545	1.5495	0.000924421	3.346	3.135	3.2405	0.0103595
P17844	Probable ATP-dependent RNA helicase DDX5 OS=Homo sapiens GN=DDX5 PE=1 SV=1	6.7	7.019	6.8595	0.00740014	1.568	1.529	1.5485	0.00400821	3.736	3.78	3.758	0.00186342
P10412	Histone H1.4 OS=Homo sapiens GN=HIST1H1E PE=1 SV=2	3.544	3.293	3.4185	0.0116805	1.562	1.533	1.5475	0.00298246	1.896	1.719	1.8075	0.0155729
O75533	Splicing factor 3B subunit 1 OS=Homo sapiens GN=SF3B1 PE=1 SV=3	4.716	6.696	5.706	0.0546829	1.597	1.495	1.546	0.0104967	2.59	3.309	2.9495	0.0386068
P46777	60S ribosomal protein L5 OS=Homo sapiens GN=RPL5 PE=1 SV=3	5.558	6.235	5.8965	0.0182532	1.51	1.582	1.546	0.00741079	3.179	3.389	3.284	0.0101739
Q92616	eIF-2-alpha kinase activator GCN1 OS=Homo sapiens GN=GCN1 PE=1 SV=6	8.763	8.208	8.4855	0.0104059	1.493	1.594	1.5435	0.0104107	4.059	4.194	4.1265	0.00520635
Q99832	T-complex protein 1 subunit eta OS=Homo sapiens GN=CCT7 PE=1 SV=2	6.498	6.992	6.745	0.0116512	1.597	1.486	1.5415	0.0114554	3.298	3.55	3.424	0.0117082
P09211	Glutathione S-transferase P OS=Homo sapiens GN=GSTP1 PE=1 SV=2	5.312	5.55	5.431	0.00697345	1.509	1.574	1.5415	0.00671005	2.892	3.11	3.001	0.0115563
P22314	Ubiquitin-like modifier-activating enzyme 1 OS=Homo sapiens GN=UBA1 PE=1 SV=3	5.392	5.588	5.49	0.00568143	1.462	1.616	1.539	0.0159126	2.525	3.078	2.8015	0.0313149
Q08211	ATP-dependent RNA helicase A OS=Homo sapiens GN=DHX9 PE=1 SV=4	7.307	7.117	7.212	0.00419269	1.551	1.524	1.5375	0.00279484	3.401	3.489	3.445	0.00406528
P39023	60S ribosomal protein L3 OS=Homo sapiens GN=RPL3 PE=1 SV=2	7.619	8.14	7.8795	0.0105196	1.495	1.578	1.5365	0.00859528	4.288	4.312	4.3	0.000888304
P62244	40S ribosomal protein S15a OS=Homo sapiens GN=RPS15A PE=1 SV=2	7.54	8.252	7.896	0.0143416	1.566	1.506	1.536	0.0062162	3.43	3.902	3.666	0.0204631
Q9NZI8	Insulin-like growth factor 2 mRNA-binding protein 1 OS=Homo sapiens GN=IGF2BP1 PE=1 SV=2	5.394	7.575	6.4845	0.053034	1.524	1.546	1.535	0.00228101	3.249	3.599	3.424	0.0162546
Q5T4S7	E3 ubiquitin-protein ligase UBR4 OS=Homo sapiens GN=UBR4 PE=1 SV=1	8.065	7.73	7.8975	0.0067501	1.516	1.552	1.534	0.00373489	3.892	3.593	3.7425	0.0127086
P07437	Tubulin beta chain OS=Homo sapiens GN=TUBB PE=1 SV=2	6.623	7.066	6.8445	0.0102975	1.505	1.561	1.533	0.00581323	3.371	3.573	3.472	0.00925698
Q9BQE3	Tubulin alpha-1C chain OS=Homo sapiens GN=TUBA1C PE=1 SV=1	10.274	9.339	9.8065	0.0151631	1.534	1.521	1.5275	0.0013545	5.198	4.796	4.997	0.0127968
O43390	Heterogeneous nuclear ribonucleoprotein R OS=Homo sapiens GN=HNRNPR PE=1 SV=1	5.674	5.987	5.8305	0.0085419	1.461	1.585	1.523	0.012951	3.176	3.065	3.1205	0.00566074
P07355	Annexin A2 OS=Homo sapiens GN=ANXA2 PE=1 SV=2	6.253	5.683	5.968	0.0151893	1.534	1.512	1.523	0.00229898	3.119	2.729	2.924	0.0211965
P61224	Ras-related protein Rap-1b OS=Homo sapiens GN=RAP1B PE=1 SV=1	7.645	7.467	7.556	0.00374911	1.478	1.567	1.5225	0.00930099	3.822	4.382	4.102	0.021694
P21980	Protein-glutamine gamma-glutamyltransferase 2 OS=Homo sapiens GN=TGM2 PE=1 SV=2	6.251	6.187	6.219	0.00163786	1.487	1.528	1.5075	0.00432833	3.048	3.239	3.1435	0.00966733
Q00610	Clathrin heavy chain 1 OS=Homo sapiens GN=CLTC PE=1 SV=5	7.948	6.886	7.417	0.0227497	1.447	1.557	1.502	0.0116506	3.471	3.42	3.4455	0.00235576
P00558	Phosphoglycerate kinase 1 OS=Homo sapiens GN=PGK1 PE=1 SV=3	6.139	5.421	5.78	0.0197451	1.494	1.508	1.501	0.00148445	3.083	3.167	3.125	0.00427783
P08238	Heat shock protein HSP 90-beta OS=Homo sapiens GN=HSP90AB1 PE=1 SV=4	7.027	7.08	7.0535	0.00119588	1.489	1.504	1.4965	0.00159526	3.594	3.576	3.585	0.000799103
P30101	Protein disulfide-isomerase A3 OS=Homo sapiens GN=PDIA3 PE=1 SV=4	6.891	6.57	6.7305	0.00758919	1.393	1.598	1.4955	0.0217826	2.088	2.139	2.1135	0.00384032
P62913	60S ribosomal protein L11 OS=Homo sapiens GN=RPL11 PE=1 SV=2	6.55	7.93	7.24	0.0302448	1.398	1.591	1.4945	0.0205248	3.661	3.852	3.7565	0.00809052
P62249	40S ribosomal protein S16 OS=Homo sapiens GN=RPS16 PE=1 SV=2	6.575	6.656	6.6155	0.00194866	1.499	1.49	1.4945	0.000958441	3.166	3.19	3.178	0.00120192
P68104	Elongation factor 1-alpha 1 OS=Homo sapiens GN=EEF1A1 PE=1 SV=1	6.516	6.406	6.461	0.00270958	1.477	1.498	1.4875	0.00224686	3.438	3.407	3.4225	0.00144157
O94788	Retinal dehydrogenase 2 OS=Homo sapiens GN=ALDH1A2 PE=1 SV=3	8.128	6.325	7.2265	0.0395048	1.492	1.483	1.4875	0.000962951	1.604	1.468	1.536	0.0140826
Q7L2E3	Putative ATP-dependent RNA helicase DHX30 OS=Homo sapiens GN=DHX30 PE=1 SV=1	4.805	8.359	6.582	0.0839358	1.251	1.715	1.483	0.0493959	3.317	4.494	3.9055	0.0476063
Q15084	Protein disulfide-isomerase A6 OS=Homo sapiens GN=PDIA6 PE=1 SV=1	4.809	4.135	4.472	0.0239419	1.349	1.616	1.4825	0.0285869	1.656	1.323	1.4895	0.0354344
P13010	X-ray repair cross-complementing protein 5 OS=Homo sapiens GN=XRCC5 PE=1 SV=3	7.906	5.604	6.755	0.0537216	1.403	1.561	1.482	0.0169519	3.44	3.107	3.2735	0.0161763
O94776	Metastasis-associated protein MTA2 OS=Homo sapiens GN=MTA2 PE=1 SV=1	7.183	7.383	7.283	0.00437031	1.409	1.546	1.4775	0.014747	3.755	3.894	3.8245	0.00578379
P12956	X-ray repair cross-complementing protein 6 OS=Homo sapiens GN=XRCC6 PE=1 SV=2	6.811	6.2	6.5055	0.0149369	1.467	1.475	1.471	0.000865558	2.717	3.154	2.9355	0.0236494
P49411	Elongation factor Tu, mitochondrial OS=Homo sapiens GN=TUFM PE=1 SV=2	5.996	5.726	5.861	0.00733053	1.467	1.475	1.471	0.000865558	2.89	2.862	2.876	0.00154948
P83731	60S ribosomal protein L24 OS=Homo sapiens GN=RPL24 PE=1 SV=1	7.535	6.712	7.1235	0.0183673	1.493	1.445	1.469	0.00519997	3.371	3.49	3.4305	0.00552034
P53396	ATP-citrate synthase OS=Homo sapiens GN=ACLY PE=1 SV=3	7.638	6.445	7.0415	0.0269005	1.48	1.457	1.4685	0.00249267	3.951	3.324	3.6375	0.0273661
P05141	ADP/ATP translocase 2 OS=Homo sapiens GN=SLC25A5 PE=1 SV=7	6.96	7.904	7.432	0.0201885	1.464	1.468	1.466	0.000434256	3.821	4.001	3.911	0.00732366
O60814	Histone H2B type 1-K OS=Homo sapiens GN=HIST1H2BK PE=1 SV=3	3.165	3.085	3.125	0.00407414	1.487	1.441	1.464	0.00500036	1.687	1.591	1.639	0.00931941
Q96P70	Importin-9 OS=Homo sapiens GN=IPO9 PE=1 SV=3	4.212	5.359	4.7855	0.0379656	1.459	1.467	1.463	0.000870291	2.66	2.74	2.7	0.00471536
P62899	60S ribosomal protein L31 OS=Homo sapiens GN=RPL31 PE=1 SV=1	3.587	3.826	3.7065	0.010259	1.433	1.48	1.4565	0.00513535	1.978	1.929	1.9535	0.0039919
P13489	Ribonuclease inhibitor OS=Homo sapiens GN=RNH1 PE=1 SV=2	6.107	7.358	6.7325	0.0294887	1.313	1.599	1.456	0.0311626	3.418	3.562	3.49	0.00656592
Q96QK1	Vacuolar protein sorting-associated protein 35 OS=Homo sapiens GN=VPS35 PE=1 SV=2	5.719	6.765	6.242	0.0266082	1.372	1.539	1.4555	0.018241	3.304	2.822	3.063	0.0249935
P57088	Transmembrane protein 33 OS=Homo sapiens GN=TMEM33 PE=1 SV=2	8.134	7.076	7.605	0.0221059	1.411	1.484	1.4475	0.00802477	4.07	3.346	3.708	0.0309774
P60174	Triosephosphate isomerase OS=Homo sapiens GN=TPI1 PE=1 SV=3	5.117	4.863	4.99	0.00809953	1.477	1.391	1.434	0.009542	2.979	2.223	2.601	0.045938
P62701	40S ribosomal protein S4, X isoform OS=Homo sapiens GN=RPS4X PE=1 SV=2	7.352	7.751	7.5515	0.00840734	1.393	1.47	1.4315	0.00855884	3.92	4.045	3.9825	0.00499504
P10809	60 kDa heat shock protein, mitochondrial OS=Homo sapiens GN=HSPD1 PE=1 SV=2	6.087	6.204	6.1455	0.00302995	1.453	1.408	1.4305	0.00500621	3.105	2.773	2.939	0.0179596
Q15029	116 kDa U5 small nuclear ribonucleoprotein component OS=Homo sapiens GN=EFTUD2 PE=1 SV=1	5.841	6.117	5.979	0.00734554	1.325	1.534	1.4295	0.0232279	2.877	3.053	2.965	0.00944454
P46782	40S ribosomal protein S5 OS=Homo sapiens GN=RPS5 PE=1 SV=4	6.233	6.212	6.2225	0.000537123	1.403	1.453	1.428	0.00557208	3.683	3.138	3.4105	0.0253791
P05455	Lupus La protein OS=Homo sapiens GN=SSB PE=1 SV=2	4.879	5.652	5.2655	0.0233229	1.388	1.465	1.4265	0.00858882	2.732	2.699	2.7155	0.0019341
Q14152	Eukaryotic translation initiation factor 3 subunit A OS=Homo sapiens GN=EIF3A PE=1 SV=1	6.081	5.956	6.0185	0.00330542	1.356	1.483	1.4195	0.0142298	2.946	2.646	2.796	0.0170604
P78344	Eukaryotic translation initiation factor 4 gamma 2 OS=Homo sapiens GN=EIF4G2 PE=1 SV=1	6.675	6.826	6.7505	0.00355994	1.492	1.345	1.4185	0.0164786	3.584	3.567	3.5755	0.000756713
Q9Y3T9	Nucleolar complex protein 2 homolog OS=Homo sapiens GN=NOC2L PE=1 SV=4	7.637	7.839	7.738	0.00415449	1.415	1.41	1.4125	0.00056338	3.63	3.205	3.4175	0.019767
Q12905	Interleukin enhancer-binding factor 2 OS=Homo sapiens GN=ILF2 PE=1 SV=2	8.637	7.314	7.9755	0.0263408	1.361	1.461	1.411	0.0112749	4.319	4.021	4.17	0.0113688
Q9H583	HEAT repeat-containing protein 1 OS=Homo sapiens GN=HEATR1 PE=1 SV=3	6.152	7.524	6.838	0.0318269	1.391	1.427	1.409	0.00406619	3.957	3.932	3.9445	0.00100871
P61978	Heterogeneous nuclear ribonucleoprotein K OS=Homo sapiens GN=HNRNPK PE=1 SV=1	7.039	6.111	6.575	0.0224261	1.384	1.429	1.4065	0.00509162	3.654	3.318	3.486	0.0153284
Q9NR30	Nucleolar RNA helicase 2 OS=Homo sapiens GN=DDX21 PE=1 SV=5	8.673	7.418	8.0455	0.0247761	1.386	1.423	1.4045	0.00419252	4.057	3.938	3.9975	0.00473747
P04083	Annexin A1 OS=Homo sapiens GN=ANXA1 PE=1 SV=2	5.597	5.988	5.7925	0.0107391	1.411	1.389	1.4	0.00250095	3.4	2.67	3.035	0.0380981
P78527	DNA-dependent protein kinase catalytic subunit OS=Homo sapiens GN=PRKDC PE=1 SV=3	9.411	8.97	9.1905	0.00763548	1.383	1.405	1.394	0.00251172	4.823	4.552	4.6875	0.00919872
P49915	GMP synthase [glutamine-hydrolyzing] OS=Homo sapiens GN=GMPS PE=1 SV=1	6.035	5.725	5.88	0.00838888	1.376	1.408	1.392	0.00365857	3.243	2.956	3.0995	0.0147265
P68431	Histone H3.1 OS=Homo sapiens GN=HIST1H3A PE=1 SV=2	5.189	5.55	5.3695	0.0106962	1.344	1.436	1.39	0.0105302	2.676	2.732	2.704	0.00329599
Q04637	Eukaryotic translation initiation factor 4 gamma 1 OS=Homo sapiens GN=EIF4G1 PE=1 SV=4	6.567	9.04	7.8035	0.0500218	1.387	1.393	1.39	0.000686999	3.716	4.611	4.1635	0.0340816
P62424	60S ribosomal protein L7a OS=Homo sapiens GN=RPL7A PE=1 SV=2	7.393	4.549	5.971	0.0744196	1.337	1.42	1.3785	0.00957989	3.502	3.02	3.261	0.0234816
P68366	Tubulin alpha-4A chain OS=Homo sapiens GN=TUBA4A PE=1 SV=1	8.142	7.963	8.0525	0.00353773	1.307	1.433	1.37	0.0146273	3.293	3.517	3.405	0.0104663
P42704	Leucine-rich PPR motif-containing protein, mitochondrial OS=Homo sapiens GN=LRPPRC PE=1 SV=3	7.567	7.947	7.757	0.00779513	1.372	1.36	1.366	0.00139813	3.899	4.051	3.975	0.00608518
O00410	Importin-5 OS=Homo sapiens GN=IPO5 PE=1 SV=4	6.836	5.802	6.319	0.0259852	1.266	1.453	1.3595	0.0218574	3.445	3.416	3.4305	0.00134542
Q15269	Periodic tryptophan protein 2 homolog OS=Homo sapiens GN=PWP2 PE=2 SV=2	8.244	6.164	7.204	0.0456373	1.572	1.143	1.3575	0.049884	2.956	3.294	3.125	0.0171974
Q92973	Transportin-1 OS=Homo sapiens GN=TNPO1 PE=1 SV=2	6.661	6.841	6.751	0.00424325	1.334	1.381	1.3575	0.00550979	3.466	3.47	3.468	0.00018357
Q02543	60S ribosomal protein L18a OS=Homo sapiens GN=RPL18A PE=1 SV=2	6.928	8.37	7.649	0.0299157	1.283	1.397	1.34	0.0135319	3.274	4.005	3.6395	0.0318597
Q9HAV4	Exportin-5 OS=Homo sapiens GN=XPO5 PE=1 SV=1	8.593	7.977	8.285	0.0118279	1.341	1.337	1.339	0.000475444	3.709	4.106	3.9075	0.0161562
Q9NZ01	Very-long-chain enoyl-CoA reductase OS=Homo sapiens GN=TECR PE=1 SV=1	10.343	5.92	8.1315	0.0845254	1.366	1.308	1.337	0.00690317	3.162	3.54	3.351	0.017934
Q96N66	Lysophospholipid acyltransferase 7 OS=Homo sapiens GN=MBOAT7 PE=1 SV=2	4.181	6.576	5.3785	0.0697329	1.288	1.379	1.3335	0.0108568	3.047	3.651	3.349	0.0286265
O95373	Importin-7 OS=Homo sapiens GN=IPO7 PE=1 SV=1	7.929	7.804	7.8665	0.00252895	1.304	1.356	1.33	0.00622181	4.134	3.987	4.0605	0.00576117
Q9BPX3	Condensin complex subunit 3 OS=Homo sapiens GN=NCAPG PE=1 SV=1	5.405	5.984	5.6945	0.0161685	1.404	1.218	1.311	0.0225426	2.906	3.328	3.117	0.0215146
P04908	Histone H2A type 1-B/E OS=Homo sapiens GN=HIST1H2AB PE=1 SV=2	2.432	3.732	3.082	0.0661626	1.336	1.269	1.3025	0.00818505	1.378	1.844	1.611	0.0457203
Q14974	Importin subunit beta-1 OS=Homo sapiens GN=KPNB1 PE=1 SV=2	7.601	6.668	7.1345	0.0207836	1.282	1.307	1.2945	0.00307358	3.705	3.347	3.526	0.0161454
O75694	Nuclear pore complex protein Nup155 OS=Homo sapiens GN=NUP155 PE=1 SV=1	15.226	8.73	11.978	0.0842873	1.095	1.448	1.2715	0.0439048	2.337	4.026	3.1815	0.0825879
Q9UIA9	Exportin-7 OS=Homo sapiens GN=XPO7 PE=1 SV=3	7.177	7.133	7.155	0.000978728	1.25	1.211	1.2305	0.0050439	3.243	3.068	3.1555	0.00882427
P78417	Glutathione S-transferase omega-1 OS=Homo sapiens GN=GSTO1 PE=1 SV=2	8.626	8.372	8.499	0.00475613	1.182	1.268	1.225	0.0111687	2.312	2.422	2.367	0.00739497
Q00325	Phosphate carrier protein, mitochondrial OS=Homo sapiens GN=SLC25A3 PE=1 SV=2	9.503	9.428	9.4655	0.00126106	1.218	1.213	1.2155	0.000654688	3.947	3.842	3.8945	0.00429073
P61619	Protein transport protein Sec61 subunit alpha isoform 1 OS=Homo sapiens GN=SEC61A1 PE=1 SV=2	7.527	7.048	7.2875	0.0104573	1.232	1.149	1.1905	0.0110916	3.982	3.981	3.9815	3.99736e-05
O43592	Exportin-T OS=Homo sapiens GN=XPOT PE=1 SV=2	9.151	8.392	8.7715	0.0137631	1.206	1.146	1.176	0.00811839	5.089	4.887	4.988	0.00644445
P55060	Exportin-2 OS=Homo sapiens GN=CSE1L PE=1 SV=3	7.299	7.218	7.2585	0.00177604	1.229	1.109	1.169	0.0163232	3.562	3.547	3.5545	0.000671633
O14980	Exportin-1 OS=Homo sapiens GN=XPO1 PE=1 SV=1	5.868	7.207	6.5375	0.0324846	1.16	1.14	1.15	0.00276784	3.191	3.588	3.3895	0.01862
Q5VYK3	Proteasome-associated protein ECM29 homolog OS=Homo sapiens GN=ECM29 PE=1 SV=2	8.228	6.167	7.1975	0.0452663	1.068	1.212	1.14	0.0200771	3.462	3.291	3.3765	0.00805855
O15260	Surfeit locus protein 4 OS=Homo sapiens GN=SURF4 PE=1 SV=3	4.403	5.057	4.73	0.0219708	1.146	1.13	1.138	0.00223764	2.477	2.809	2.643	0.019966
O00232	26S proteasome non-ATPase regulatory subunit 12 OS=Homo sapiens GN=PSMD12 PE=1 SV=3	15.033	6.928	10.9805	0.11254	0.996	1.278	1.137	0.0392733	2.873	3.319	3.096	0.0228878
Q9UBM7	7-dehydrocholesterol reductase OS=Homo sapiens GN=DHCR7 PE=1 SV=1	9.091	8.514	8.8025	0.0104288	1.088	1.118	1.103	0.00432852	4.798	4.044	4.421	0.0270783
Q15365	Poly(rC)-binding protein 1 OS=Homo sapiens GN=PCBP1 PE=1 SV=2	6.439	6.913	6.676	0.0112954	1.001	1.062	1.0315	0.00940923	2.841	2.962	2.9015	0.00663621
Q15366	Poly(rC)-binding protein 2 OS=Homo sapiens GN=PCBP2 PE=1 SV=1	7.012	7.656	7.334	0.0139665	0.927	1.043	0.985	0.0187215	3.316	4.243	3.7795	0.0388421
Q9Y5L0	Transportin-3 OS=Homo sapiens GN=TNPO3 PE=1 SV=3	6.934	7.292	7.113	0.00800864	1.049	0.912	0.9805	0.0222018	4.242	3.565	3.9035	0.027534

## Sheet: K562
Full lists of protein targets of GA in K562 cells
Accession	Description	positive (127) / negative (126)				positive (127) / competition (128)				positive (127) / IA (129)
		1st	2nd	Avg.	p-value	1st	2nd	Avg.	p-value	1st	2nd	Avg.	p-value
Q01650	Large neutral amino acids transporter small subunit 1 OS=Homo sapiens GN=SLC7A5 PE=1 SV=2	22.193	22.182	22.1875	7.8905e-05	4.783	5.465	5.124	0.0211522	12.749	11.978	12.3635	0.00992184
P08195	4F2 cell-surface antigen heavy chain OS=Homo sapiens GN=SLC3A2 PE=1 SV=3	20.589	20.685	20.637	0.000740362	3.952	3.952	3.952	0	10.286	10.678	10.482	0.00595129
P02765	Alpha-2-HS-glycoprotein OS=Homo sapiens GN=AHSG PE=1 SV=1	12.004	10.83	11.417	0.0163514	3.678	3.473	3.5755	0.00912259	4.581	4.526	4.5535	0.00192235
O14880	Microsomal glutathione S-transferase 3 OS=Homo sapiens GN=MGST3 PE=1 SV=1	19.641	17.744	18.6925	0.0161379	3.542	3.304	3.423	0.0110615	11.574	10.642	11.108	0.0133458
Q9NZR1	Tropomodulin-2 OS=Homo sapiens GN=TMOD2 PE=1 SV=1	29.029	28.63	28.8295	0.00220267	3.119	3.468	3.2935	0.0168493	14.01	15.507	14.7585	0.0161298
P15121	Aldose reductase OS=Homo sapiens GN=AKR1B1 PE=1 SV=3	10.311	10.319	10.315	0.000123436	3.242	3.335	3.2885	0.00450066	5.944	5.45	5.697	0.0137921
P02768	Serum albumin OS=Homo sapiens GN=ALB PE=1 SV=2	12.469	13.293	12.881	0.0101777	3.304	3.118	3.211	0.00921661	3.822	4.111	3.9665	0.0115909
O15118	Niemann-Pick C1 protein OS=Homo sapiens GN=NPC1 PE=1 SV=2	19.039	19.932	19.4855	0.00729263	3.127	3.232	3.1795	0.00525546	9.547	10.498	10.0225	0.0150903
Q17RY6	Lymphocyte antigen 6K OS=Homo sapiens GN=LY6K PE=1 SV=2	15.909	17.475	16.692	0.0149206	2.833	3.455	3.144	0.0313847	8.561	10.375	9.468	0.0304002
Q96QD8	Sodium-coupled neutral amino acid transporter 2 OS=Homo sapiens GN=SLC38A2 PE=1 SV=2	17.396	17.981	17.6885	0.00526315	3.125	3.087	3.106	0.00194714	10.218	10.692	10.455	0.0072144
P69905	Hemoglobin subunit alpha OS=Homo sapiens GN=HBA1 PE=1 SV=2	21.447	21.924	21.6855	0.00350067	3.061	3.027	3.044	0.00177766	12.484	13.149	12.8165	0.0082561
Q6DD88	Atlastin-3 OS=Homo sapiens GN=ATL3 PE=1 SV=1	20.477	20.773	20.625	0.00228408	2.998	3.015	3.0065	0.000899926	10.28	10.836	10.558	0.0083794
P62979	Ubiquitin-40S ribosomal protein S27a OS=Homo sapiens GN=RPS27A PE=1 SV=2	22.25	22.398	22.324	0.00105514	2.912	2.982	2.947	0.00378022	12.561	13.204	12.8825	0.0079422
Q5JWF2	Guanine nucleotide-binding protein G(s) subunit alpha isoforms XLas OS=Homo sapiens GN=GNAS PE=1 SV=2	14.589	13.419	14.004	0.0132893	3.15	2.62	2.885	0.0291564	7.453	7.339	7.396	0.00245312
Q5BJF2	Transmembrane protein 97 OS=Homo sapiens GN=TMEM97 PE=1 SV=1	8.48	6.439	7.4595	0.0432779	2.77	2.788	2.779	0.00103087	5.736	5.977	5.8565	0.00654844
P28288	ATP-binding cassette sub-family D member 3 OS=Homo sapiens GN=ABCD3 PE=1 SV=1	11.604	15.116	13.36	0.0415993	2.756	2.795	2.7755	0.00223633	7.268	8.293	7.7805	0.0209368
P26373	60S ribosomal protein L13 OS=Homo sapiens GN=RPL13 PE=1 SV=4	4.75	4.67	4.71	0.0027032	2.716	2.814	2.765	0.00564034	2.649	2.629	2.639	0.00120617
Q969X5	Endoplasmic reticulum-Golgi intermediate compartment protein 1 OS=Homo sapiens GN=ERGIC1 PE=1 SV=1	16.916	20	18.458	0.0265303	2.932	2.463	2.6975	0.027602	9.788	9.972	9.88	0.00296393
P62805	Histone H4 OS=Homo sapiens GN=HIST1H4A PE=1 SV=2	5.428	4.417	4.9225	0.0325736	2.654	2.695	2.6745	0.00243979	2.598	2.213	2.4055	0.0254186
P49207	60S ribosomal protein L34 OS=Homo sapiens GN=RPL34 PE=1 SV=3	5.518	5.496	5.507	0.00063581	2.679	2.645	2.662	0.00203276	2.871	2.892	2.8815	0.0011599
Q9Y6M5	Zinc transporter 1 OS=Homo sapiens GN=SLC30A1 PE=1 SV=3	11.688	12.396	12.042	0.0093547	2.639	2.628	2.6335	0.000664781	6.457	7.282	6.8695	0.019091
Q6NUM9	All-trans-retinol 13,14-reductase OS=Homo sapiens GN=RETSAT PE=1 SV=2	15.965	16.809	16.387	0.00819534	2.542	2.707	2.6245	0.0100026	9.334	9.432	9.383	0.00166227
Q9BQB6	Vitamin K epoxide reductase complex subunit 1 OS=Homo sapiens GN=VKORC1 PE=1 SV=1	18.539	16.635	17.587	0.0172136	2.538	2.673	2.6055	0.00824453	8.682	8.224	8.453	0.00862122
Q5T9L3	Protein wntless homolog OS=Homo sapiens GN=WLS PE=1 SV=2	15.064	14.456	14.76	0.00655505	2.618	2.514	2.566	0.00644967	8.899	7.596	8.2475	0.0250923
P12236	ADP/ATP translocase 3 OS=Homo sapiens GN=SLC25A6 PE=1 SV=4	16.866	20.094	18.48	0.0277301	2.482	2.532	2.507	0.00317411	10.167	12.262	11.2145	0.029646
P02786	Transferrin receptor protein 1 OS=Homo sapiens GN=TFRC PE=1 SV=2	14.969	14.776	14.8725	0.00206532	2.537	2.447	2.492	0.00574735	7.292	7.588	7.44	0.00633114
Q12907	Vesicular integral-membrane protein VIP36 OS=Homo sapiens GN=LMAN2 PE=1 SV=1	17.304	15.411	16.3575	0.018398	2.514	2.309	2.4115	0.0135215	8.688	8.279	8.4835	0.00767157
O43175	D-3-phosphoglycerate dehydrogenase OS=Homo sapiens GN=PHGDH PE=1 SV=4	12.838	12.006	12.422	0.0106559	2.295	2.373	2.334	0.00531831	5.961	5.631	5.796	0.00905917
P0CW18	Serine protease 56 OS=Homo sapiens GN=PRSS56 PE=1 SV=1	12.19	12.69	12.44	0.00639604	2.234	2.354	2.294	0.00832356	6.099	5.137	5.618	0.0271866
Q96KA5	Cleft lip and palate transmembrane protein 1-like protein OS=Homo sapiens GN=CLPTM1L PE=1 SV=1	17.968	16.988	17.478	0.00892156	2.116	2.448	2.282	0.0231142	8.81	9.084	8.947	0.00487371
P14618	Pyruvate kinase PKM OS=Homo sapiens GN=PKM PE=1 SV=4	10.981	9.755	10.368	0.0187979	2.285	2.195	2.24	0.00639376	5.711	5.008	5.3595	0.0208463
P05023	Sodium/potassium-transporting ATPase subunit alpha-1 OS=Homo sapiens GN=ATP1A1 PE=1 SV=1	15.619	15.568	15.5935	0.000520531	2.219	2.233	2.226	0.00100097	7.7	7.712	7.706	0.000247841
P42766	60S ribosomal protein L35 OS=Homo sapiens GN=RPL35 PE=1 SV=2	6.065	5.958	6.0115	0.00283276	2.252	2.17	2.211	0.00590195	3.283	2.982	3.1325	0.0152813
P62277	40S ribosomal protein S13 OS=Homo sapiens GN=RPS13 PE=1 SV=2	7.901	8.89	8.3955	0.018727	2.169	2.248	2.2085	0.00569251	4.17	4.097	4.1335	0.0028107
Q96AG4	Leucine-rich repeat-containing protein 59 OS=Homo sapiens GN=LRRC59 PE=1 SV=1	14.771	14.3	14.5355	0.00515671	2.268	2.142	2.205	0.00909209	6.943	6.839	6.891	0.00240194
P07355	Annexin A2 OS=Homo sapiens GN=ANXA2 PE=1 SV=2	11.639	11.371	11.505	0.00370722	2.128	2.207	2.1675	0.00580016	4.719	4.577	4.648	0.00486193
Q9H3N1	Thioredoxin-related transmembrane protein 1 OS=Homo sapiens GN=TMX1 PE=1 SV=1	16.7	13.904	15.302	0.0290005	2.118	2.141	2.1295	0.00171896	7.212	6.252	6.732	0.0226575
P27824	Calnexin OS=Homo sapiens GN=CANX PE=1 SV=2	18.414	16.659	17.5365	0.0159145	2.306	1.922	2.114	0.0288308	8.586	8.151	8.3685	0.00827111
P35579	Myosin-9 OS=Homo sapiens GN=MYH9 PE=1 SV=4	11.811	11.64	11.7255	0.00232101	2.081	2.147	2.114	0.00496848	5.903	5.883	5.893	0.000540149
Q9P035	Very-long-chain (3R)-3-hydroxyacyl-CoA dehydratase 3 OS=Homo sapiens GN=HACD3 PE=1 SV=2	12.37	13.58	12.975	0.0148315	2.103	2.119	2.111	0.00120628	6.815	7.747	7.281	0.0203448
Q9Y320	Thioredoxin-related transmembrane protein 2 OS=Homo sapiens GN=TMX2 PE=1 SV=1	14.447	13.295	13.871	0.0132104	2.183	2.026	2.1045	0.0118678	6.617	6.794	6.7055	0.00420085
Q9Y679	Ancient ubiquitous protein 1 OS=Homo sapiens GN=AUP1 PE=1 SV=1	15.51	16.137	15.8235	0.00630563	2.047	2.152	2.0995	0.00795798	7.566	9.374	8.47	0.033845
Q9NRG9	Aladin OS=Homo sapiens GN=AAAS PE=1 SV=1	18.147	16.912	17.5295	0.0112083	2.11	2.087	2.0985	0.00174435	9.46	8.913	9.1865	0.00947391
Q9Y3E5	Peptidyl-tRNA hydrolase 2, mitochondrial OS=Homo sapiens GN=PTRH2 PE=1 SV=1	10.46	14.126	12.293	0.0471158	1.97	2.21	2.09	0.0182561	5.424	6.501	5.9625	0.0286702
Q04941	Proteolipid protein 2 OS=Homo sapiens GN=PLP2 PE=1 SV=1	10.646	12.124	11.385	0.0206325	2.153	2.026	2.0895	0.00967048	5.412	6.324	5.868	0.0246861
P11021	78 kDa glucose-regulated protein OS=Homo sapiens GN=HSPA5 PE=1 SV=2	9.588	9.898	9.743	0.00506352	2.136	2.038	2.087	0.00747212	4.949	4.491	4.72	0.0154313
A0FGR8	Extended synaptotagmin-2 OS=Homo sapiens GN=ESYT2 PE=1 SV=1	12.796	13.043	12.9195	0.00304269	2.259	1.906	2.0825	0.0269137	6.726	6.25	6.488	0.0116714
Q15388	Mitochondrial import receptor subunit TOM20 homolog OS=Homo sapiens GN=TOMM20 PE=1 SV=1	12.64	10.85	11.745	0.0242093	2.281	1.88	2.0805	0.0305814	7.089	5.809	6.449	0.031486
P52272	Heterogeneous nuclear ribonucleoprotein M OS=Homo sapiens GN=HNRNPM PE=1 SV=3	13.224	12.853	13.0385	0.00452832	2.06	2.099	2.0795	0.00298479	6.65	6.306	6.478	0.00844959
P46779	60S ribosomal protein L28 OS=Homo sapiens GN=RPL28 PE=1 SV=3	6.71	6.253	6.4815	0.0112171	2.216	1.931	2.0735	0.0218413	3.491	3.435	3.463	0.00257363
Q07020	60S ribosomal protein L18 OS=Homo sapiens GN=RPL18 PE=1 SV=2	4.762	4.896	4.829	0.00441611	2.06	2.073	2.0665	0.00100121	3.145	3.15	3.1475	0.000252827
P47914	60S ribosomal protein L29 OS=Homo sapiens GN=RPL29 PE=1 SV=2	7.135	7.256	7.1955	0.0026763	1.974	2.106	2.04	0.0102947	3.365	3.727	3.546	0.0162335
P46781	40S ribosomal protein S9 OS=Homo sapiens GN=RPS9 PE=1 SV=3	4.721	3.964	4.3425	0.0276745	2.118	1.954	2.036	0.012813	2.794	2.392	2.593	0.024625
Q8TCT9	Minor histocompatibility antigen H13 OS=Homo sapiens GN=HM13 PE=1 SV=1	18.603	18.772	18.6875	0.0014393	1.94	2.122	2.031	0.0142525	9.223	10.912	10.0675	0.0266387
Q15149	Plectin OS=Homo sapiens GN=PLEC PE=1 SV=3	10.652	11.656	11.154	0.0143163	1.85	2.2	2.025	0.0274401	5.624	5.943	5.7835	0.00877627
Q92598	Heat shock protein 105 kDa OS=Homo sapiens GN=HSPH1 PE=1 SV=1	11.079	8.189	9.634	0.0473899	1.893	2.141	2.017	0.0195443	5.301	4.205	4.753	0.0365384
P57088	Transmembrane protein 33 OS=Homo sapiens GN=TMEM33 PE=1 SV=2	13.657	14.236	13.9465	0.00660649	1.982	2.052	2.017	0.00552292	6.378	6.734	6.556	0.00864021
O14828	Secretory carrier-associated membrane protein 3 OS=Homo sapiens GN=SCAMP3 PE=1 SV=3	12.439	14.969	13.704	0.0292998	2.077	1.944	2.0105	0.0105247	6.264	7.877	7.0705	0.0361519
Q96TC7	Regulator of microtubule dynamics protein 3 OS=Homo sapiens GN=RMDN3 PE=1 SV=2	12.672	14.926	13.799	0.0259396	1.979	2.025	2.002	0.00365675	6.581	7.415	6.998	0.0189452
Q6NUQ4	Transmembrane protein 214 OS=Homo sapiens GN=TMEM214 PE=1 SV=2	16.589	14.725	15.657	0.0189254	1.967	2.025	1.996	0.00462442	8.718	7.915	8.3165	0.0153553
P61204	ADP-ribosylation factor 3 OS=Homo sapiens GN=ARF3 PE=1 SV=2	12.706	11.404	12.055	0.0171728	1.907	2.057	1.982	0.0120393	6.176	4.957	5.5665	0.0347148
P18031	Tyrosine-protein phosphatase non-receptor type 1 OS=Homo sapiens GN=PTPN1 PE=1 SV=1	19.164	16.458	17.811	0.0241338	2.116	1.839	1.9775	0.0222574	10.027	8.191	9.109	0.0319711
P62899	60S ribosomal protein L31 OS=Homo sapiens GN=RPL31 PE=1 SV=1	5.812	5.228	5.52	0.0168225	1.864	2.07	1.967	0.0166528	2.899	2.65	2.7745	0.0142739
P16615	Sarcoplasmic/endoplasmic reticulum calcium ATPase 2 OS=Homo sapiens GN=ATP2A2 PE=1 SV=1	13.582	14.291	13.9365	0.00809504	1.987	1.944	1.9655	0.00348176	7.333	7.35	7.3415	0.00036854
E9PRG8	Uncharacterized protein C11orf98 OS=Homo sapiens GN=C11orf98 PE=4 SV=1	6.807	6.647	6.727	0.00378528	1.986	1.944	1.965	0.00340166	3.652	3.381	3.5165	0.0122593
P62910	60S ribosomal protein L32 OS=Homo sapiens GN=RPL32 PE=1 SV=2	5.852	5.877	5.8645	0.000678467	1.961	1.96	1.9605	8.11808e-05	3.228	3.257	3.2425	0.00142343
P84098	60S ribosomal protein L19 OS=Homo sapiens GN=RPL19 PE=1 SV=1	5.975	6.513	6.244	0.0137047	2.03	1.881	1.9555	0.012121	3.206	3.473	3.3395	0.012718
Q02878	60S ribosomal protein L6 OS=Homo sapiens GN=RPL6 PE=1 SV=3	6.633	7.19	6.9115	0.0128194	1.983	1.918	1.9505	0.00530331	4.348	4.639	4.4935	0.0103033
Q7Z2W4	Zinc finger CCCH-type antiviral protein 1 OS=Homo sapiens GN=ZC3HAV1 PE=1 SV=3	11.646	10.461	11.0535	0.017046	1.921	1.955	1.938	0.00279212	6.121	5.554	5.8375	0.0154467
P05141	ADP/ATP translocase 2 OS=Homo sapiens GN=SLC25A5 PE=1 SV=7	15.576	15.563	15.5695	0.000132889	1.903	1.964	1.9335	0.00502076	7.898	7.956	7.927	0.00116449
O15258	Protein RER1 OS=Homo sapiens GN=RER1 PE=1 SV=1	14.937	14.752	14.8445	0.00198345	1.963	1.901	1.932	0.00510702	7.606	6.987	7.2965	0.0134939
Q00839	Heterogeneous nuclear ribonucleoprotein U OS=Homo sapiens GN=HNRNPU PE=1 SV=6	14.695	15.238	14.9665	0.00577367	1.942	1.921	1.9315	0.00173038	7.781	7.865	7.823	0.00170892
O43681	ATPase ASNA1 OS=Homo sapiens GN=ASNA1 PE=1 SV=2	17.904	16.451	17.1775	0.0134545	1.841	1.985	1.913	0.0119746	8.168	8.105	8.1365	0.00123231
P00558	Phosphoglycerate kinase 1 OS=Homo sapiens GN=PGK1 PE=1 SV=3	11.149	10.882	11.0155	0.0038575	1.82	2.002	1.911	0.0151462	5.342	5.284	5.313	0.00173742
P53985	Monocarboxylate transporter 1 OS=Homo sapiens GN=SLC16A1 PE=1 SV=3	10.678	9.927	10.3025	0.0115965	1.951	1.865	1.908	0.00717244	6.116	5.488	5.802	0.0172099
O75844	CAAX prenyl protease 1 homolog OS=Homo sapiens GN=ZMPSTE24 PE=1 SV=2	14.62	13.802	14.211	0.0091586	1.928	1.888	1.908	0.00333646	6.901	6.568	6.7345	0.00786811
P49411	Elongation factor Tu, mitochondrial OS=Homo sapiens GN=TUFM PE=1 SV=2	10.731	10.873	10.802	0.00209218	1.865	1.933	1.899	0.00569846	5.045	5.204	5.1245	0.00493777
Q5SNT2	Transmembrane protein 201 OS=Homo sapiens GN=TMEM201 PE=1 SV=1	12.599	11.823	12.211	0.0101108	1.763	2.009	1.886	0.02073	6.299	6.353	6.326	0.00135857
P29401	Transketolase OS=Homo sapiens GN=TKT PE=1 SV=3	10.337	10.338	10.3375	1.53959e-05	1.812	1.959	1.8855	0.012402	4.984	5.653	5.3185	0.0199933
P60709	Actin, cytoplasmic 1 OS=Homo sapiens GN=ACTB PE=1 SV=1	10.433	10.071	10.252	0.00561921	1.85	1.892	1.871	0.00357254	4.631	4.759	4.695	0.00433878
P55072	Transitional endoplasmic reticulum ATPase OS=Homo sapiens GN=VCP PE=1 SV=4	11.363	13.071	12.217	0.0222146	1.756	1.963	1.8595	0.0176989	6.079	6.113	6.096	0.000887673
P34932	Heat shock 70 kDa protein 4 OS=Homo sapiens GN=HSPA4 PE=1 SV=4	13.656	14.478	14.067	0.00929752	1.86	1.847	1.8535	0.00111627	6.454	7.557	7.0055	0.025007
P41091	Eukaryotic translation initiation factor 2 subunit 3 OS=Homo sapiens GN=EIF2S3 PE=1 SV=3	16.717	13.131	14.924	0.03806	1.878	1.787	1.8325	0.00790184	7.605	5.7	6.6525	0.0452677
O14975	Very long-chain acyl-CoA synthetase OS=Homo sapiens GN=SLC27A2 PE=1 SV=2	14.639	13.194	13.9165	0.0165108	1.782	1.879	1.8305	0.0084318	6.016	5.115	5.5655	0.0257096
Q9BQG0	Myb-binding protein 1A OS=Homo sapiens GN=MYBBP1A PE=1 SV=2	9.802	12.6	11.201	0.0395519	1.789	1.869	1.829	0.00696029	6.182	8.459	7.3205	0.0491108
P35998	26S protease regulatory subunit 7 OS=Homo sapiens GN=PSMC2 PE=1 SV=3	13.401	10.953	12.177	0.0318886	1.864	1.784	1.824	0.00697936	5.657	4.678	5.1675	0.0300627
P25705	ATP synthase subunit alpha, mitochondrial OS=Homo sapiens GN=ATP5A1 PE=1 SV=1	13.388	12.453	12.9205	0.0115123	1.911	1.724	1.8175	0.0163608	6.182	6.034	6.108	0.00385622
P32119	Peroxiredoxin-2 OS=Homo sapiens GN=PRDX2 PE=1 SV=5	13.125	12.324	12.7245	0.0100154	1.772	1.861	1.8165	0.00779629	4.804	4.561	4.6825	0.00825755
P26639	Threonine--tRNA ligase, cytoplasmic OS=Homo sapiens GN=TARS PE=1 SV=3	9.685	12.641	11.163	0.0419011	1.79	1.829	1.8095	0.00343012	5.02	5.61	5.315	0.0176491
O00571	ATP-dependent RNA helicase DDX3X OS=Homo sapiens GN=DDX3X PE=1 SV=3	11.031	12.039	11.535	0.0138991	1.684	1.933	1.8085	0.0218784	5.269	5.566	5.4175	0.00872306
P53621	Coatomer subunit alpha OS=Homo sapiens GN=COPA PE=1 SV=2	14.107	11.7	12.9035	0.0296029	1.773	1.834	1.8035	0.0053826	6.965	6.055	6.51	0.0222113
P30101	Protein disulfide-isomerase A3 OS=Homo sapiens GN=PDIA3 PE=1 SV=4	10.826	11.074	10.95	0.00360445	1.73	1.872	1.801	0.0125421	3.671	3.756	3.7135	0.00364281
Q9Y3U8	60S ribosomal protein L36 OS=Homo sapiens GN=RPL36 PE=1 SV=3	7.653	7.546	7.5995	0.00224084	1.787	1.812	1.7995	0.00221106	4.017	3.978	3.9975	0.00155272
O95573	Long-chain-fatty-acid--CoA ligase 3 OS=Homo sapiens GN=ACSL3 PE=1 SV=3	12.582	12.496	12.539	0.00109158	1.827	1.771	1.799	0.00495384	6.4	7.1	6.75	0.0164902
P22314	Ubiquitin-like modifier-activating enzyme 1 OS=Homo sapiens GN=UBA1 PE=1 SV=3	11.786	9.889	10.8375	0.0277877	1.784	1.803	1.7935	0.00168604	5.719	4.879	5.299	0.0251767
P45880	Voltage-dependent anion-selective channel protein 2 OS=Homo sapiens GN=VDAC2 PE=1 SV=2	15.45	14.324	14.887	0.0120322	1.716	1.86	1.788	0.0128109	6.643	6.839	6.741	0.00462723
Q08J23	tRNA (cytosine(34)-C(5))-methyltransferase OS=Homo sapiens GN=NSUN2 PE=1 SV=2	11.066	11.599	11.3325	0.00748413	1.639	1.914	1.7765	0.024588	6.045	5.975	6.01	0.0018537
Q12769	Nuclear pore complex protein Nup160 OS=Homo sapiens GN=NUP160 PE=1 SV=3	12.808	13.316	13.062	0.00618899	1.703	1.847	1.775	0.0129047	5.732	5.264	5.498	0.0135394
P61927	60S ribosomal protein L37 OS=Homo sapiens GN=RPL37 PE=1 SV=2	6.534	7.467	7.0005	0.0211803	1.857	1.692	1.7745	0.0147882	4.04	4.721	4.3805	0.0246928
P04406	Glyceraldehyde-3-phosphate dehydrogenase OS=Homo sapiens GN=GAPDH PE=1 SV=3	9.554	9.657	9.6055	0.00170661	1.774	1.758	1.766	0.00144194	4.542	4.73	4.636	0.0064532
P10599	Thioredoxin OS=Homo sapiens GN=TXN PE=1 SV=3	8.742	8.145	8.4435	0.0112484	1.717	1.781	1.749	0.0058232	1.386	1.426	1.406	0.00452757
P48651	Phosphatidylserine synthase 1 OS=Homo sapiens GN=PTDSS1 PE=1 SV=1	11.877	12.387	12.132	0.0066895	1.703	1.782	1.7425	0.0072144	5.813	7.036	6.4245	0.0302065
Q9NVI1	Fanconi anemia group I protein OS=Homo sapiens GN=FANCI PE=1 SV=4	15.82	12.151	13.9855	0.0415162	1.723	1.755	1.739	0.00292859	6.401	6.925	6.663	0.01251
Q99714	3-hydroxyacyl-CoA dehydrogenase type-2 OS=Homo sapiens GN=HSD17B10 PE=1 SV=3	12.817	14.092	13.4545	0.0150709	1.642	1.826	1.734	0.0168726	5.779	6.665	6.222	0.0226252
P00338	L-lactate dehydrogenase A chain OS=Homo sapiens GN=LDHA PE=1 SV=2	12.131	11.891	12.011	0.00318008	1.758	1.705	1.7315	0.00487124	5.757	6.115	5.936	0.00959572
P10809	60 kDa heat shock protein, mitochondrial OS=Homo sapiens GN=HSPD1 PE=1 SV=2	12.158	11.328	11.743	0.0112445	1.712	1.742	1.727	0.00276464	5.65	5.579	5.6145	0.00201262
Q15084	Protein disulfide-isomerase A6 OS=Homo sapiens GN=PDIA6 PE=1 SV=1	7.921	7.477	7.699	0.0091759	1.658	1.784	1.721	0.011647	3.7	3.559	3.6295	0.00618213
P23246	Splicing factor, proline- and glutamine-rich OS=Homo sapiens GN=SFPQ PE=1 SV=2	9.66	10.003	9.8315	0.00555201	1.686	1.753	1.7195	0.00620066	5.102	5.071	5.0865	0.000969977
P50914	60S ribosomal protein L14 OS=Homo sapiens GN=RPL14 PE=1 SV=4	8.955	10.983	9.969	0.032266	1.657	1.736	1.6965	0.00740994	5.441	5.425	5.433	0.000468706
Q92841	Probable ATP-dependent RNA helicase DDX17 OS=Homo sapiens GN=DDX17 PE=1 SV=2	12.656	13.556	13.106	0.010925	1.68	1.703	1.6915	0.00216406	7.167	6.382	6.7745	0.0184216
P62753	40S ribosomal protein S6 OS=Homo sapiens GN=RPS6 PE=1 SV=1	9.89	9.942	9.916	0.000834615	1.669	1.712	1.6905	0.00404809	5.277	5.505	5.391	0.00673009
P57678	Gem-associated protein 4 OS=Homo sapiens GN=GEMIN4 PE=1 SV=2	16.224	18.733	17.4785	0.0228072	1.653	1.724	1.6885	0.00669135	8.517	7.564	8.0405	0.0188418
Q86VP6	Cullin-associated NEDD8-dissociated protein 1 OS=Homo sapiens GN=CAND1 PE=1 SV=2	11.189	11.54	11.3645	0.00491521	1.738	1.638	1.688	0.00942585	5.487	5.708	5.5975	0.00628293
P62136	Serine/threonine-protein phosphatase PP1-alpha catalytic subunit OS=Homo sapiens GN=PPP1CA PE=1 SV=1	15.772	12.922	14.347	0.0315124	1.693	1.682	1.6875	0.00103745	7.556	7.089	7.3225	0.0101468
Q9BUR5	MICOS complex subunit MIC26 OS=Homo sapiens GN=APOO PE=1 SV=1	13.495	12.87	13.1825	0.00754434	1.669	1.68	1.6745	0.0010455	5.708	6.094	5.901	0.010407
Q06830	Peroxiredoxin-1 OS=Homo sapiens GN=PRDX1 PE=1 SV=1	11.697	11.758	11.7275	0.000827835	1.666	1.66	1.663	0.00057422	5.228	5.202	5.215	0.000793484
P60174	Triosephosphate isomerase OS=Homo sapiens GN=TPI1 PE=1 SV=3	7.891	9.221	8.556	0.0246904	1.56	1.758	1.65	0.0189725	3.374	4.561	3.9675	0.0472656
P22626	Heterogeneous nuclear ribonucleoproteins A2/B1 OS=Homo sapiens GN=HNRNPA2B1 PE=1 SV=2	8.538	8.789	8.6635	0.00461073	1.798	1.517	1.65	0.0269176	4.267	4.521	4.394	0.00919757
Q12905	Interleukin enhancer-binding factor 2 OS=Homo sapiens GN=ILF2 PE=1 SV=2	13.753	10.83	12.2915	0.0376712	1.651	1.661	1.65	0.000961078	7.055	6.448	6.7515	0.0142993
P62820	Ras-related protein Rab-1A OS=Homo sapiens GN=RAB1A PE=1 SV=3	12.774	13.01	12.892	0.0029134	1.736	1.573	1.6545	0.0156672	6.222	6.711	6.4665	0.0120296
Q9Y490	Talin-1 OS=Homo sapiens GN=TLN1 PE=1 SV=3	8.424	9.778	9.101	0.0236347	1.665	1.642	1.6535	0.00221379	4.519	4.216	4.3675	0.0110371
Q7L1Q6	Basic leucine zipper and W2 domain-containing protein 1 OS=Homo sapiens GN=BZW1 PE=1 SV=1	11.361	10.363	10.862	0.0146129	1.663	1.642	1.6525	0.00202252	6.134	6.217	6.1755	0.00213904
O43143	Pre-mRNA-splicing factor ATP-dependent RNA helicase DHX15 OS=Homo sapiens GN=DHX15 PE=1 SV=2	15.252	14.674	14.963	0.00614717	1.635	1.664	1.6495	0.00279804	6.183	5.619	5.901	0.0152
Q96QK1	Vacuolar protein sorting-associated protein 35 OS=Homo sapiens GN=VPS35 PE=1 SV=2	10.95	10.834	10.892	0.00169499	1.617	1.678	1.6475	0.00589217	6.026	6.092	6.059	0.00173364
P15880	40S ribosomal protein S2 OS=Homo sapiens GN=RPS2 PE=1 SV=2	10.567	12.017	11.292	0.020409	1.578	1.715	1.6465	0.0132351	5.183	5.905	5.544	0.0206977
Q7KZF4	Staphylococcal nuclease domain-containing protein 1 OS=Homo sapiens GN=SND1 PE=1 SV=1	10.734	11.876	11.305	0.0160637	1.591	1.702	1.6465	0.0107255	5.177	5.536	5.3565	0.0106628
Q00325	Phosphate carrier protein, mitochondrial OS=Homo sapiens GN=SLC25A3 PE=1 SV=2	15.627	20.268	17.9475	0.0409284	1.687	1.604	1.6455	0.00802617	5.984	6.359	6.1715	0.00966779
P46977	Dolichyl-diphosphooligosaccharide--protein glycosyltransferase subunit STT3A OS=Homo sapiens GN=STT3A PE=1 SV=2	15.052	12.808	13.93	0.0255832	1.626	1.659	1.6425	0.00319753	8.676	6.962	7.819	0.0347496
O95373	Importin-7 OS=Homo sapiens GN=IPO7 PE=1 SV=1	12.989	13.422	13.2055	0.00521812	1.597	1.67	1.6335	0.00711134	6.647	6.519	6.583	0.00309451
P52701	DNA mismatch repair protein Msh6 OS=Homo sapiens GN=MSH6 PE=1 SV=2	11.481	14.314	12.8975	0.0348196	1.592	1.673	1.6325	0.0078952	6.161	6.755	6.458	0.0146286
P30050	60S ribosomal protein L12 OS=Homo sapiens GN=RPL12 PE=1 SV=1	9.072	9.16	9.116	0.00153637	1.655	1.6	1.6275	0.005378	4.427	4.207	4.317	0.00810899
P40429	60S ribosomal protein L13a OS=Homo sapiens GN=RPL13A PE=1 SV=2	7.061	7.205	7.133	0.00321289	1.631	1.604	1.6175	0.00265662	4.006	4.124	4.065	0.00461967
P35232	Prohibitin OS=Homo sapiens GN=PHB PE=1 SV=1	12.534	10.888	11.711	0.0223328	1.586	1.63	1.608	0.00435471	5.541	5.821	5.681	0.0078427
P31943	Heterogeneous nuclear ribonucleoprotein H OS=Homo sapiens GN=HNRNPH1 PE=1 SV=4	10.931	10.502	10.7165	0.0063704	1.634	1.576	1.605	0.00575077	5.508	5.135	5.3215	0.0111511
P50395	Rab GDP dissociation inhibitor beta OS=Homo sapiens GN=GDI2 PE=1 SV=2	8.774	9.232	9.003	0.00809477	1.558	1.649	1.6035	0.00902976	4.681	4.563	4.622	0.00406302
P62917	60S ribosomal protein L8 OS=Homo sapiens GN=RPL8 PE=1 SV=2	11.673	11.32	11.4965	0.00488647	1.672	1.529	1.6005	0.0142106	5.83	5.538	5.684	0.00817435
O75533	Splicing factor 3B subunit 1 OS=Homo sapiens GN=SF3B1 PE=1 SV=3	11.786	13.321	12.5535	0.0194367	1.554	1.614	1.584	0.00602788	6.479	6.537	6.508	0.0014184
P62263	40S ribosomal protein S14 OS=Homo sapiens GN=RPS14 PE=1 SV=3	9.9	10.147	10.0235	0.00392171	1.575	1.581	1.578	0.000605151	4.942	5.12	5.031	0.00563042
P07195	L-lactate dehydrogenase B chain OS=Homo sapiens GN=LDHB PE=1 SV=2	11.956	10.717	11.3365	0.0173772	1.58	1.568	1.574	0.00121337	5.763	5.215	5.489	0.0158762
P08865	40S ribosomal protein SA OS=Homo sapiens GN=RPSA PE=1 SV=4	9.441	9.482	9.4615	0.000689673	1.537	1.594	1.5655	0.00579421	4.706	4.712	4.709	0.000202788
Q96RQ3	Methylcrotonoyl-CoA carboxylase subunit alpha, mitochondrial OS=Homo sapiens GN=MCCC1 PE=1 SV=3	9.153	7.046	8.0995	0.0411713	1.546	1.568	1.557	0.00224878	4.4	3.325	3.8625	0.0440129
Q92973	Transportin-1 OS=Homo sapiens GN=TNPO1 PE=1 SV=2	10.802	13.588	12.195	0.0362027	1.548	1.566	1.557	0.00183992	5.795	6.376	6.0855	0.0151834
P0DMV9	Heat shock 70 kDa protein 1B OS=Homo sapiens GN=HSPA1B PE=1 SV=1	10.235	10.507	10.371	0.00417391	1.591	1.522	1.5565	0.00705422	5.042	5.241	5.1415	0.00615927
P46777	60S ribosomal protein L5 OS=Homo sapiens GN=RPL5 PE=1 SV=3	10.006	9.256	9.631	0.0123877	1.481	1.625	1.553	0.0147469	4.54	4.497	4.5185	0.00151458
P68366	Tubulin alpha-4A chain OS=Homo sapiens GN=TUBA4A PE=1 SV=1	13.177	11.842	12.5095	0.0169687	1.577	1.525	1.551	0.00533545	5.911	5.888	5.8995	0.000620486
P61619	Protein transport protein Sec61 subunit alpha isoform 1 OS=Homo sapiens GN=SEC61A1 PE=1 SV=2	14.681	14.952	14.8165	0.00291093	1.583	1.517	1.55	0.0067759	7.773	7.662	7.7175	0.00228907
Q99442	Translocation protein SEC62 OS=Homo sapiens GN=SEC62 PE=1 SV=1	16.023	13.805	14.914	0.0236259	1.516	1.582	1.549	0.00678027	4.399	5.812	5.1055	0.0437698
P30153	Serine/threonine-protein phosphatase 2A 65 kDa regulatory subunit A alpha isoform OS=Homo sapiens GN=PPP2R1A PE=1 SV=4	11.482	10.188	10.835	0.018985	1.64	1.453	1.5465	0.0192213	6.107	4.797	5.452	0.0380591
Q9Y6C9	Mitochondrial carrier homolog 2 OS=Homo sapiens GN=MTCH2 PE=1 SV=1	17.119	16.726	16.9225	0.00369597	1.559	1.533	1.546	0.00267654	7.753	8.053	7.903	0.00604084
P07737	Profilin-1 OS=Homo sapiens GN=PFN1 PE=1 SV=2	10.961	10.773	10.867	0.00275333	1.548	1.538	1.543	0.00103146	5.147	4.909	5.028	0.00753218
P11766	Alcohol dehydrogenase class-3 OS=Homo sapiens GN=ADH5 PE=1 SV=4	10.337	9.131	9.734	0.0196934	1.604	1.476	1.54	0.0132209	5.434	4.929	5.1815	0.0154993
P11498	Pyruvate carboxylase, mitochondrial OS=Homo sapiens GN=PC PE=1 SV=2	6.122	5.456	5.789	0.0182899	1.511	1.562	1.5365	0.00528224	2.961	2.707	2.834	0.0142549
P68371	Tubulin beta-4B chain OS=Homo sapiens GN=TUBB4B PE=1 SV=1	12.639	10.548	11.5935	0.0286277	1.495	1.573	1.534	0.00809088	4.862	5.597	5.2295	0.0223323
O75694	Nuclear pore complex protein Nup155 OS=Homo sapiens GN=NUP155 PE=1 SV=1	13.265	13.4	13.3325	0.00161153	1.387	1.678	1.5325	0.0301309	5.674	6.487	6.0805	0.0212484
Q00610	Clathrin heavy chain 1 OS=Homo sapiens GN=CLTC PE=1 SV=5	11.79	11.985	11.8875	0.00261069	1.581	1.479	1.53	0.0106064	6.055	5.785	5.92	0.0072575
P61313	60S ribosomal protein L15 OS=Homo sapiens GN=RPL15 PE=1 SV=2	8.965	8.643	8.804	0.00582033	1.556	1.504	1.53	0.00540867	4.73	4.636	4.683	0.00319455
P49368	T-complex protein 1 subunit gamma OS=Homo sapiens GN=CCT3 PE=1 SV=4	13.18	12.649	12.9145	0.00654298	1.574	1.475	1.5245	0.0103318	6.528	6.219	6.3735	0.00771464
P49327	Fatty acid synthase OS=Homo sapiens GN=FASN PE=1 SV=3	9.616	8.709	9.1625	0.015742	1.496	1.55	1.523	0.00564246	4.97	4.168	4.569	0.0278652
P02100	Hemoglobin subunit epsilon OS=Homo sapiens GN=HBE1 PE=1 SV=2	16.199	15.418	15.8085	0.00786126	1.48	1.558	1.519	0.00817074	8.001	7.295	7.648	0.0146814
P26641	Elongation factor 1-gamma OS=Homo sapiens GN=EEF1G PE=1 SV=3	9.975	11.983	10.979	0.0290278	1.508	1.528	1.518	0.00209687	5.183	5.434	5.3085	0.00752387
P13010	X-ray repair cross-complementing protein 5 OS=Homo sapiens GN=XRCC5 PE=1 SV=3	9.254	10.052	9.653	0.0131496	1.461	1.574	1.5175	0.0118459	5.703	4.872	5.2875	0.024962
O75691	Small subunit processome component 20 homolog OS=Homo sapiens GN=UTP20 PE=1 SV=3	14.54	13.62	14.08	0.0103956	1.495	1.533	1.514	0.00399443	5.788	5.905	5.8465	0.0031849
Q5JTH9	RRP12-like protein OS=Homo sapiens GN=RRP12 PE=1 SV=2	11.851	12.851	12.351	0.012879	1.518	1.502	1.51	0.00168639	6.401	6.737	6.569	0.0081389
P18206	Vinculin OS=Homo sapiens GN=VCL PE=1 SV=4	9.714	9.073	9.3935	0.0108563	1.424	1.593	1.5085	0.0178118	5.196	5.083	5.1395	0.00349913
Q16658	Fascin OS=Homo sapiens GN=FSCN1 PE=1 SV=3	8.912	9.173	9.0425	0.00459348	1.544	1.469	1.5065	0.00792178	4.467	4.279	4.373	0.00684119
Q9Y2X3	Nucleolar protein 58 OS=Homo sapiens GN=NOP58 PE=1 SV=1	11.937	10.385	11.161	0.0220958	1.564	1.448	1.506	0.0122529	5.998	5.027	5.5125	0.0279622
Q8TEX9	Importin-4 OS=Homo sapiens GN=IPO4 PE=1 SV=2	9.32	9.39	9.355	0.00119089	1.582	1.428	1.505	0.0162714	5.425	5.396	5.4105	0.00085306
Q5SRE5	Nucleoporin NUP188 homolog OS=Homo sapiens GN=NUP188 PE=1 SV=1	11.762	13.459	12.6105	0.0213853	1.472	1.528	1.5	0.00594109	6.253	7.652	6.9525	0.0319182
Q99460	26S proteasome non-ATPase regulatory subunit 1 OS=Homo sapiens GN=PSMD1 PE=1 SV=2	10.296	11.51	10.903	0.0177029	1.463	1.517	1.49	0.0057674	5.41	5.799	5.6045	0.0110423
Q15021	Condensin complex subunit 1 OS=Homo sapiens GN=NCAPD2 PE=1 SV=3	11.076	11.197	11.1365	0.00172923	1.543	1.431	1.487	0.0119818	5.64	5.236	5.438	0.0118185
Q12906	Interleukin enhancer-binding factor 3 OS=Homo sapiens GN=ILF3 PE=1 SV=3	11.987	14.069	13.028	0.0253806	1.455	1.512	1.4835	0.0061144	7.513	7.351	7.432	0.00346906
O43592	Exportin-T OS=Homo sapiens GN=XPOT PE=1 SV=2	11.89	12.97	12.43	0.0138197	1.51	1.451	1.4805	0.00634171	6.726	5.812	6.269	0.0231633
P63244	Receptor of activated protein C kinase 1 OS=Homo sapiens GN=RACK1 PE=1 SV=3	11.432	12.346	11.889	0.0122295	1.482	1.474	1.478	0.000861459	5.382	5.751	5.5665	0.0105464
P56192	Methionine--tRNA ligase, cytoplasmic OS=Homo sapiens GN=MARS PE=1 SV=2	9.179	9.52	9.3495	0.00580414	1.533	1.412	1.4725	0.0130709	4.867	4.996	4.9315	0.004163
P54136	Arginine--tRNA ligase, cytoplasmic OS=Homo sapiens GN=RARS PE=1 SV=2	9.939	11.973	10.956	0.029463	1.448	1.492	1.47	0.00476347	5.168	5.654	5.411	0.0142852
P50990	T-complex protein 1 subunit theta OS=Homo sapiens GN=CCT8 PE=1 SV=4	11.993	11.794	11.8935	0.00266289	1.459	1.478	1.4685	0.00205918	5.829	6.142	5.9855	0.0083208
O94776	Metastasis-associated protein MTA2 OS=Homo sapiens GN=MTA2 PE=1 SV=1	13.763	11.58	12.6715	0.0273511	1.495	1.441	1.468	0.00585381	5.955	6.203	6.079	0.00649201
P61247	40S ribosomal protein S3a OS=Homo sapiens GN=RPS3A PE=1 SV=2	9.944	9.426	9.685	0.00851034	1.441	1.48	1.4605	0.00424969	5.501	5.27	5.3855	0.00682558
P62280	40S ribosomal protein S11 OS=Homo sapiens GN=RPS11 PE=1 SV=3	12.059	11.802	11.9305	0.00342829	1.44	1.48	1.46	0.00436014	5.656	5.636	5.646	0.000563779
P07437	Tubulin beta chain OS=Homo sapiens GN=TUBB PE=1 SV=2	11.922	13.139	12.5305	0.0154455	1.456	1.458	1.457	0.000218469	5.832	6.292	6.062	0.0120713
P62937	Peptidyl-prolyl cis-trans isomerase A OS=Homo sapiens GN=PPIA PE=1 SV=2	9.62	10.425	10.0225	0.0127763	1.408	1.497	1.4525	0.00974896	4.399	5.068	4.7335	0.0224565
P48643	T-complex protein 1 subunit epsilon OS=Homo sapiens GN=CCT5 PE=1 SV=1	12.872	10.901	11.8865	0.0263306	1.387	1.517	1.452	0.0142399	5.498	5.407	5.4525	0.00265617
P62258	14-3-3 protein epsilon OS=Homo sapiens GN=YWHAE PE=1 SV=1	5.757	7.333	6.545	0.0381401	1.534	1.368	1.451	0.0181881	2.948	3.885	3.4165	0.0433788
Q96N66	Lysophospholipid acyltransferase 7 OS=Homo sapiens GN=MBOAT7 PE=1 SV=2	9.292	11.664	10.478	0.0358767	1.566	1.33	1.448	0.0258824	5.287	6.259	5.773	0.0267339
P83731	60S ribosomal protein L24 OS=Homo sapiens GN=RPL24 PE=1 SV=1	10.162	10.803	10.4825	0.00972922	1.471	1.416	1.4435	0.00606336	5.184	5.007	5.0955	0.00552794
P23396	40S ribosomal protein S3 OS=Homo sapiens GN=RPS3 PE=1 SV=2	11.646	12.377	12.0115	0.00968292	1.496	1.383	1.4395	0.0124872	5.412	5.965	5.6885	0.0154599
O94906	Pre-mRNA-processing factor 6 OS=Homo sapiens GN=PRPF6 PE=1 SV=1	11.678	10.146	10.912	0.0223081	1.467	1.412	1.4395	0.00608021	6.004	5.875	5.9395	0.00345655
P14866	Heterogeneous nuclear ribonucleoprotein L OS=Homo sapiens GN=HNRNPL PE=1 SV=2	10.536	11.672	11.104	0.0162682	1.466	1.402	1.434	0.00710197	5.322	5.968	5.645	0.0181935
Q99832	T-complex protein 1 subunit eta OS=Homo sapiens GN=CCT7 PE=1 SV=2	11.66	11.079	11.3695	0.00813131	1.396	1.468	1.432	0.00800052	5.677	5.599	5.638	0.00220182
P62424	60S ribosomal protein L7a OS=Homo sapiens GN=RPL7A PE=1 SV=2	9.052	9.138	9.095	0.00150492	1.438	1.424	1.431	0.00155706	4.515	4.41	4.4625	0.00374465
Q05639	Elongation factor 1-alpha 2 OS=Homo sapiens GN=EEF1A2 PE=1 SV=1	11.865	11.112	11.4885	0.0104279	1.387	1.461	1.424	0.00826883	4.647	5.662	5.1545	0.0312394
P07900	Heat shock protein HSP 90-alpha OS=Homo sapiens GN=HSP90AA1 PE=1 SV=5	11.184	12.676	11.93	0.0198785	1.442	1.405	1.4235	0.00413657	5.476	5.915	5.6955	0.0122613
P04908	Histone H2A type 1-B/E OS=Homo sapiens GN=HIST1H2AB PE=1 SV=2	5.643	6.299	5.971	0.0174679	1.439	1.403	1.421	0.00403186	2.388	2.505	2.4465	0.00760988
P61978	Heterogeneous nuclear ribonucleoprotein K OS=Homo sapiens GN=HNRNPK PE=1 SV=1	11.252	11.784	11.518	0.00734983	1.435	1.4	1.4175	0.00392955	5.268	5.325	5.2965	0.00171278
Q9H583	HEAT repeat-containing protein 1 OS=Homo sapiens GN=HEATR1 PE=1 SV=3	12.334	10.92	11.627	0.0193316	1.392	1.441	1.4165	0.00550499	6.323	6.031	6.177	0.00752219
P62854	40S ribosomal protein S26 OS=Homo sapiens GN=RPS26 PE=1 SV=3	13.127	13.253	13.19	0.00152035	1.47	1.363	1.4165	0.0120166	6.477	6.64	6.5585	0.00395531
P17844	Probable ATP-dependent RNA helicase DDX5 OS=Homo sapiens GN=DDX5 PE=1 SV=1	12.326	11.696	12.011	0.00834607	1.44	1.379	1.4095	0.00688679	5.72	6.175	5.9475	0.0121699
P08243	Asparagine synthetase [glutamine-hydrolyzing] OS=Homo sapiens GN=ASNS PE=1 SV=4	12.581	10.649	11.615	0.0264125	1.289	1.523	1.406	0.0264272	6.456	5.575	6.0155	0.0232675
P78344	Eukaryotic translation initiation factor 4 gamma 2 OS=Homo sapiens GN=EIF4G2 PE=1 SV=1	11.414	10.832	11.123	0.00832573	1.475	1.332	1.4035	0.016202	5.492	5.213	5.3525	0.0082941
P53618	Coatomer subunit beta OS=Homo sapiens GN=COPB1 PE=1 SV=3	12.854	10.081	11.4675	0.0383	1.368	1.438	1.403	0.00793908	5.352	5.149	5.2505	0.00615264
P06748	Nucleophosmin OS=Homo sapiens GN=NPM1 PE=1 SV=2	9.981	8.53	9.2555	0.0249001	1.402	1.399	1.4005	0.000340924	4.456	4.092	4.274	0.0135464
P11142	Heat shock cognate 71 kDa protein OS=Homo sapiens GN=HSPA8 PE=1 SV=1	9.426	9.773	9.5995	0.00575246	1.401	1.393	1.397	0.000911407	4.386	4.648	4.517	0.00922889
Q9Y3T9	Nucleolar complex protein 2 homolog OS=Homo sapiens GN=NOC2L PE=1 SV=4	9.709	12.763	11.236	0.0429957	1.376	1.418	1.397	0.00478454	4.842	5.57	5.206	0.0222199
P25205	DNA replication licensing factor MCM3 OS=Homo sapiens GN=MCM3 PE=1 SV=3	8.602	10.8	9.701	0.0359074	1.374	1.41	1.392	0.00411585	4.424	5.58	5.002	0.0366195
Q08211	ATP-dependent RNA helicase A OS=Homo sapiens GN=DHX9 PE=1 SV=4	12.445	11.457	11.951	0.01315	1.369	1.415	1.392	0.00525895	5.961	5.706	5.8335	0.00695604
P63104	14-3-3 protein zeta/delta OS=Homo sapiens GN=YWHAZ PE=1 SV=1	10.022	12.406	11.214	0.0337084	1.437	1.34	1.3885	0.011114	4.667	5.658	5.1625	0.0304583
P36578	60S ribosomal protein L4 OS=Homo sapiens GN=RPL4 PE=1 SV=5	12.347	12.046	12.1965	0.00392762	1.392	1.381	1.3865	0.00126267	6.194	6.201	6.1975	0.000179764
O60506	Heterogeneous nuclear ribonucleoprotein Q OS=Homo sapiens GN=SYNCRIP PE=1 SV=2	11.088	8.246	9.667	0.0464572	1.348	1.419	1.3835	0.0081659	5.464	5.097	5.2805	0.011057
P62826	GTP-binding nuclear protein Ran OS=Homo sapiens GN=RAN PE=1 SV=3	12.219	12.218	12.2185	1.30257e-05	1.354	1.412	1.383	0.00667363	5.368	5.524	5.446	0.00455866
P39023	60S ribosomal protein L3 OS=Homo sapiens GN=RPL3 PE=1 SV=2	12.392	12.268	12.33	0.00160057	1.363	1.368	1.3655	0.000582771	6.514	6.182	6.348	0.0083219
P17987	T-complex protein 1 subunit alpha OS=Homo sapiens GN=TCP1 PE=1 SV=1	10.972	10.499	10.7355	0.00701114	1.335	1.395	1.365	0.0069947	5.014	4.753	4.8835	0.00850406
P13639	Elongation factor 2 OS=Homo sapiens GN=EEF2 PE=1 SV=4	10.762	11.257	11.0095	0.00715459	1.33	1.393	1.3615	0.00736318	5.142	5.278	5.21	0.00415429
P62244	40S ribosomal protein S15a OS=Homo sapiens GN=RPS15A PE=1 SV=2	13.411	14.305	13.858	0.0102638	1.32	1.388	1.354	0.00799133	5.98	5.9	5.94	0.00214347
Q9NR30	Nucleolar RNA helicase 2 OS=Homo sapiens GN=DDX21 PE=1 SV=5	12.828	14.273	13.5505	0.0169559	1.35	1.342	1.346	0.00094594	6.411	6.9	6.6555	0.0116883
O43390	Heterogeneous nuclear ribonucleoprotein R OS=Homo sapiens GN=HNRNPR PE=1 SV=1	10.365	11.585	10.975	0.0176738	1.396	1.29	1.343	0.0125552	5.245	6.065	5.655	0.0230379
P09651	Heterogeneous nuclear ribonucleoprotein A1 OS=Homo sapiens GN=HNRNPA1 PE=1 SV=5	11.499	10.231	10.865	0.0185531	1.337	1.34	1.3385	0.000356716	4.118	3.762	3.94	0.0143707
P62241	40S ribosomal protein S8 OS=Homo sapiens GN=RPS8 PE=1 SV=2	11.322	11.261	11.2915	0.0008598	1.333	1.343	1.338	0.00118949	5.762	5.887	5.8245	0.0034155
Q13838	Spliceosome RNA helicase DDX39B OS=Homo sapiens GN=DDX39B PE=1 SV=1	12.076	9.67	10.873	0.0350755	1.315	1.36	1.3375	0.00535424	5.425	4.896	5.1605	0.0163006
P27635	60S ribosomal protein L10 OS=Homo sapiens GN=RPL10 PE=1 SV=4	10.217	13.918	12.0675	0.0484342	1.312	1.357	1.3345	0.00536627	5.378	7.271	6.3245	0.0472861
Q92616	eIF-2-alpha kinase activator GCN1 OS=Homo sapiens GN=GCN1 PE=1 SV=6	12.54	12.041	12.2905	0.00646088	1.311	1.344	1.3275	0.00395619	5.886	5.999	5.9425	0.00302633
P40227	T-complex protein 1 subunit zeta OS=Homo sapiens GN=CCT6A PE=1 SV=3	8.928	10.173	9.5505	0.0207181	1.227	1.421	1.324	0.0232787	4.787	4.997	4.892	0.00683103
Q9BXJ9	N-alpha-acetyltransferase 15, NatA auxiliary subunit OS=Homo sapiens GN=NAA15 PE=1 SV=1	12.792	13.046	12.919	0.00312904	1.232	1.405	1.3185	0.0208528	6.193	6.277	6.235	0.00214416
Q9H3U1	Protein unc-45 homolog A OS=Homo sapiens GN=UNC45A PE=1 SV=1	11.935	10.824	11.3795	0.0155262	1.352	1.272	1.312	0.00970156	6.323	5.501	5.912	0.0220932
P04075	Fructose-bisphosphate aldolase A OS=Homo sapiens GN=ALDOA PE=1 SV=2	11.401	11.265	11.333	0.00190989	1.318	1.296	1.307	0.0026789	5.601	5.713	5.657	0.00315092
P13489	Ribonuclease inhibitor OS=Homo sapiens GN=RNH1 PE=1 SV=2	9.289	9.064	9.1765	0.00390215	1.307	1.303	1.305	0.000487831	4.847	4.957	4.902	0.00357126
Q14498	RNA-binding protein 39 OS=Homo sapiens GN=RBM39 PE=1 SV=2	7.646	7.905	7.7755	0.00530092	1.231	1.373	1.302	0.0173407	4.603	4.726	4.6645	0.00419657
Q13263	Transcription intermediary factor 1-beta OS=Homo sapiens GN=TRIM28 PE=1 SV=5	8.558	12.128	10.343	0.0543982	1.373	1.202	1.2875	0.0211073	4.614	5.253	4.9335	0.0205854
P42704	Leucine-rich PPR motif-containing protein, mitochondrial OS=Homo sapiens GN=LRPPRC PE=1 SV=3	13.162	11.998	12.58	0.0147158	1.247	1.306	1.2765	0.00735485	6.367	5.954	6.1605	0.0106658
P04083	Annexin A1 OS=Homo sapiens GN=ANXA1 PE=1 SV=2	8.9	10.424	9.662	0.0250519	1.271	1.275	1.273	0.000500094	4.191	3.96	4.0755	0.00901851
Q9BQE3	Tubulin alpha-1C chain OS=Homo sapiens GN=TUBA1C PE=1 SV=1	14.887	15.435	15.161	0.00575209	1.266	1.268	1.267	0.000251231	7.406	7.439	7.4225	0.000707592
Q02543	60S ribosomal protein L18a OS=Homo sapiens GN=RPL18A PE=1 SV=2	10.842	13.589	12.2155	0.0356408	1.265	1.261	1.263	0.000504053	5.467	6.828	6.1475	0.0350926
O00410	Importin-5 OS=Homo sapiens GN=IPO5 PE=1 SV=4	12.441	10.085	11.263	0.0331715	1.25	1.271	1.2605	0.00265147	5.932	5.458	5.695	0.013239
Q14974	Importin subunit beta-1 OS=Homo sapiens GN=KPNB1 PE=1 SV=2	10.424	11.738	11.081	0.0188507	1.238	1.224	1.231	0.00181003	5.657	5.887	5.772	0.00634109
P06733	Alpha-enolase OS=Homo sapiens GN=ENO1 PE=1 SV=2	10.634	9.257	9.9455	0.0220006	1.264	1.189	1.2265	0.00972923	5.098	4.593	4.8455	0.0165722
P27348	14-3-3 protein theta OS=Homo sapiens GN=YWHAQ PE=1 SV=1	13.647	12.297	12.972	0.0165484	1.2	1.251	1.2255	0.00662238	5.835	5.189	5.512	0.0186315
Q5T4S7	E3 ubiquitin-protein ligase UBR4 OS=Homo sapiens GN=UBR4 PE=1 SV=1	9.885	11.872	10.8785	0.0289898	1.243	1.204	1.2235	0.00507276	5.992	5.723	5.8575	0.00730775
P02008	Hemoglobin subunit zeta OS=Homo sapiens GN=HBZ PE=1 SV=2	15.514	19.13	17.322	0.033104	1.1	1.345	1.2225	0.03179	8.13	9.913	9.0215	0.0313534
P40926	Malate dehydrogenase, mitochondrial OS=Homo sapiens GN=MDH2 PE=1 SV=3	11.18	11.809	11.4945	0.00870708	1.21	1.207	1.2085	0.000395089	5.887	5.061	5.474	0.0239703
Q13085	Acetyl-CoA carboxylase 1 OS=Homo sapiens GN=ACACA PE=1 SV=2	6.542	6.666	6.604	0.00298828	1.271	1.141	1.206	0.0171394	3.188	3.257	3.2225	0.00340769
Q04637	Eukaryotic translation initiation factor 4 gamma 1 OS=Homo sapiens GN=EIF4G1 PE=1 SV=4	13.57	12.711	13.1405	0.0104003	1.115	1.273	1.194	0.0210301	6.683	6.656	6.6695	0.000644303
P68431	Histone H3.1 OS=Homo sapiens GN=HIST1H3A PE=1 SV=2	9.6	11.392	10.496	0.0271071	1.215	1.168	1.1915	0.00627722	4.302	4.482	4.392	0.00652183
P68104	Elongation factor 1-alpha 1 OS=Homo sapiens GN=EEF1A1 PE=1 SV=1	11.816	11.823	11.8195	9.42582e-05	1.183	1.169	1.176	0.00189468	5.6	5.724	5.662	0.00348542
P22234	Multifunctional protein ADE2 OS=Homo sapiens GN=PAICS PE=1 SV=3	10.571	11.683	11.127	0.0158923	1.213	1.126	1.1695	0.0118342	5.586	5.572	5.579	0.000399385
O14980	Exportin-1 OS=Homo sapiens GN=XPO1 PE=1 SV=1	13.096	12.979	13.0375	0.00142826	1.143	1.189	1.166	0.00627803	6.363	6.866	6.6145	0.0120971
P55060	Exportin-2 OS=Homo sapiens GN=CSE1L PE=1 SV=3	11.846	11.263	11.5545	0.0080287	1.192	1.063	1.1275	0.0181895	5.552	5.79	5.671	0.00667842
P08238	Heat shock protein HSP 90-beta OS=Homo sapiens GN=HSP90AB1 PE=1 SV=4	10.69	10.728	10.709	0.000564748	1.133	1.09	1.1115	0.00615637	5.228	5.082	5.155	0.00450729
P46782	40S ribosomal protein S5 OS=Homo sapiens GN=RPS5 PE=1 SV=4	10.395	8.57	9.4825	0.0305369	1.063	1.141	1.102	0.0112604	5.277	4.557	4.917	0.0232637
P10515	Dihydrolipoyllysine-residue acetyltransferase component of pyruvate dehydrogenase complex, mitochondrial OS=Homo sapiens GN=DLAT PE=1 SV=3	15.122	14.338	14.73	0.00846898	1.084	1.108	1.096	0.00348501	7.391	6.734	7.0625	0.014795
P78527	DNA-dependent protein kinase catalytic subunit OS=Homo sapiens GN=PRKDC PE=1 SV=3	13.366	13.643	13.5045	0.00326442	1.065	1.068	1.0665	0.000447693	6.636	6.65	6.643	0.000335416
Q9HAV4	Exportin-5 OS=Homo sapiens GN=XPO5 PE=1 SV=1	11.01	10.844	10.927	0.00241779	1.161	0.959	1.06	0.0302382	5.662	5.185	5.4235	0.0139888
Q15366	Poly(rC)-binding protein 2 OS=Homo sapiens GN=PCBP2 PE=1 SV=1	15.526	15.077	15.3015	0.00466983	0.998	1.063	1.0305	0.0100356	7.465	7.432	7.4485	0.000705122
Q8WUX1	Sodium-coupled neutral amino acid transporter 5 OS=Homo sapiens GN=SLC38A5 PE=1 SV=1	11.821	9.911	10.866	0.0279042	0.922	1.041	0.9815	0.0192728	5.875	5.651	5.763	0.00618536
Q15365	Poly(rC)-binding protein 1 OS=Homo sapiens GN=PCBP1 PE=1 SV=2	11.403	11.37	11.3865	0.000461258	0.889	1.058	0.9735	0.0275603	5.161	5.561	5.361	0.0118695
P52597	Heterogeneous nuclear ribonucleoprotein F OS=Homo sapiens GN=HNRNPF PE=1 SV=3	11.879	11.542	11.7105	0.00457978	0.986	0.92	0.953	0.0110179	6.037	6.157	6.097	0.00313236
O00299	Chloride intracellular channel protein 1 OS=Homo sapiens GN=CLIC1 PE=1 SV=4	9.344	10.436	9.89	0.0175552	0.85	0.797	0.8235	0.0102396	4.424	4.322	4.373	0.00371211
Q9UBM7	7-dehydrocholesterol reductase OS=Homo sapiens GN=DHCR7 PE=1 SV=1	12.888	9.97	11.429	0.0404161	0.635	0.77	0.7025	0.0304913	5.811	4.976	5.3935	0.0245907
